# Supplementary material for: Observation of ultrafast interfacial Meitner-Auger energy transfer in a Van der Waals heterostructure
Source: Springer Nature journal article supplement (doi:10.1038/s41467-023-40815-8), 2023-08-19
Supplement: 41467_2023_40815_MOESM1_ESM.pdf [file 41467_2023_40815_MOESM1_ESM.pdf]

1 **Supplementary Information for:**  
2 **Observation of ultrafast interfacial Meitner-Auger energy**  
3 **transfer in a van der Waals heterostructure**

4 Shuo Dong<sup>1,2\*</sup>, Samuel Beaulieu<sup>1,3</sup>, Malte Selig<sup>4</sup>, Philipp Rosenzweig<sup>5</sup>, Dominik Christiansen<sup>4</sup>,  
5 Tommaso Pincelli<sup>1</sup>, Maciej Dendzik<sup>1,6</sup>, Jonas D. Ziegler<sup>7,8</sup>, Julian Maklar<sup>1</sup>, R. Patrick Xian<sup>1,9</sup>,  
6 Alexander Neef<sup>1</sup>, Avaise Mohammed<sup>5</sup>, Armin Schulz<sup>5</sup>, Mona Stadler<sup>10</sup>, Michael Jetter<sup>10</sup>, Peter  
7 Michler<sup>10</sup>, Takashi Taniguchi<sup>11</sup>, Kenji Watanabe<sup>12</sup>, Hidenori Takagi<sup>5,13,14</sup>, Ulrich Starke<sup>5</sup>, Alexey  
8 Chernikov<sup>7</sup>, Martin Wolf<sup>1</sup>, Hiro Nakamura<sup>5,15</sup>, Andreas Knorr<sup>4</sup>, Laurenz Rettig<sup>1\*</sup> & Ralph Ernstorfer<sup>1,16\*</sup>

9 <sup>1</sup>*Fritz-Haber-Institut der Max-Planck-Gesellschaft, Faradayweg 4-6, 14195 Berlin, Germany*

10 <sup>2</sup>*Beijing National Laboratory for Condensed Matter Physics, Institute of Physics, Chinese*  
11 *Academy of Sciences, Beijing 100190, China*

12 <sup>3</sup>*Université de Bordeaux - CNRS - CEA, CELIA, UMR5107, F33405, Talence, France*

13 <sup>4</sup>*Nichtlineare Optik und Quantenelektronik, Institut für Theoretische Physik, Technische*  
14 *Universität Berlin, 10623 Berlin, Germany*

15 <sup>5</sup>*Max Planck Institute for Solid State Research, 70569 Stuttgart, Germany*

16 <sup>6</sup>*Department of Applied Physics, KTH Royal Institute of Technology, Hannes Alfvéns väg 12, 114*  
17 *19 Stockholm, Sweden*

18 <sup>7</sup>*Institute of Applied Physics and Würzburg-Dresden Cluster of Excellence ct.qmat, Technische*  
19 *Universität Dresden, 01062 Dresden, Germany*

20 <sup>8</sup>*Photonics Laboratory, ETH Zürich, 8093 Zürich, Switzerland*

21 <sup>9</sup>*Department of Statistical Sciences, University of Toronto, 700 University Avenue, Toronto, ON*

22 *M5G 1Z5, Canada*

23 <sup>10</sup>*Institute of Semiconductor Optics and Functional Interfaces, Research Center SCoPE and IQST,*  
24 *University of Stuttgart, 70569 Stuttgart, Germany*

25 <sup>11</sup>*International Center for Materials Nanoarchitectonics, National Institute for Materials Science,*  
26 *1-1 Namiki, Tsukuba 305-0044, Japan*

27 <sup>12</sup>*Research Center for Electronic and Optical Materials, National Institute for Materials Science,*  
28 *1-1 Namiki, Tsukuba 305-0044, Japan*

29 <sup>13</sup>*Department of Physics, University of Tokyo, 113-0033 Tokyo, Japan*

30 <sup>14</sup>*Institute for Functional Matter and Quantum Technologies, University of Stuttgart, 70569*  
31 *Stuttgart, Germany*

32 <sup>15</sup>*Department of Physics, University of Arkansas, Fayetteville, Arkansas 72701, USA*

33 <sup>16</sup>*Institut für Optik und Atomare Physik, Technische Universität Berlin, 10623 Berlin, Germany*

34 This file includes:

35 Supplementary Notes

36 Supplementary Methods

37 Supplementary Equation (1) to (88)

38 Supplementary Fig.1 to Supplementary Fig.14

39 Supplementary Table 1

40 References

## 41 Supplementary Notes

### 42 Characterization of the ML-WSe<sub>2</sub>/graphene heterostructure

43 Raman measurements were carried out at room temperature using a 532 nm laser with a power of 1  
44 mW and a spot size of 5 to 10  $\mu\text{m}$ . As shown in Supplementary Fig. 1a, ML-WSe<sub>2</sub> is confirmed by  
45 an intense peak at 250  $\text{cm}^{-1}$  which comes from essentially degenerate A<sub>1g</sub> and E<sub>2g</sub> lattice vibration  
46 modes<sup>1,2</sup>. Photoluminescence (PL) measurements are performed using another system with a 532  
47 nm excitation laser, power of 1 mW and spot size of 1  $\mu\text{m}$  at room temperature. In Supplementary  
48 Fig. 1b, ML-WSe<sub>2</sub> on graphene presents two weak PL peaks (778 nm and 914 nm) only slightly  
49 above the background. The peak at 778 nm is close in energy to the A-exciton transition energy<sup>3,4</sup>.  
50 The origin of the peak at higher wavelength is unknown, and may come from the existence of  
51 in-gap defect states. The weakness of the PL signals is consistent with the quenching of PL known  
52 to occur for ML-TMDCs adjacent to graphene<sup>5</sup>.

53 The sample is protected by the Se capping layer before sending to our lab. After introducing  
54 the sample into our ultrahigh vacuum (UHV) photoemission end-station, we have annealed the  
55 sample for 15 minutes at 400°C through direct current heating to remove the Se capping. After  
56 annealing, we recorded a low energy electron diffraction (LEED) pattern with the incident beam  
57 energy of 95 eV, to verify the surface cleanliness and ordering (Supplementary Fig. 1c). The six  
58 outer sharp LEED spots come from the bottom ML graphene layer (yellow box) and the inner six  
59 arc-shaped diffraction spots originate from the top ML-WSe<sub>2</sub> layer (red box). The occurrence of a  
60 well-oriented hexagonal pattern of WSe<sub>2</sub> spots aligned to the graphene pattern attests the epitaxial

61 nature of our heterostructure and single-domain lattice orientation. A certain level of strain-induced  
62 misalignment between nanoislands of WSe<sub>2</sub> with respect to the graphene layer is evident from the  
63 azimuthal widths of the diffraction spots.

64 Our sample exhibits areas without WSe<sub>2</sub>, since the top WSe<sub>2</sub> layer consists of spatially  
65 uniform small islands with some distance between the islands. However, the relevant processes  
66 discussed in our manuscript, *i.e.*, both interlayer hot electron injection with 1.2 eV pump and  
67 Meitner-Auger type interlayer energy transfer with 1.55 eV pump, are based on the photoemission  
68 signals from the heterostructure, but will not occur at an isolated graphene or WSe<sub>2</sub> layer. For  
69 example, the observation of the excited state population at WSe<sub>2</sub> with below-bandgap excitation  
70 is not possible for an isolated monolayer WSe<sub>2</sub>. With near-resonant pump, the deep-lying holes  
71 would not be excited in a pure graphene sample. Therefore, the signal discussed in our work is  
72 based on the heterostructure area.

73 Additionally, the doping level of epitaxial graphene is different from the pristine graphene  
74 without WSe<sub>2</sub>. We discuss possible reasons for this observation: static charge (electron) transfer  
75 from graphene to WSe<sub>2</sub>, or the decrease of electrons at the graphene/SiC interface with W or Se  
76 intercalation as the referee suggested. In the latter case that a substantial part of the Se or W  
77 elements is intercalated below the graphene layer, the intensity of the diffraction pattern of SiC,  
78 *i.e.*, 6×6 spots around the graphene (10) and diamond-shape distributed spots around  $\sqrt{3} \times \sqrt{3}$   
79 SiC, would be dramatically reduced. As we observed a clear SiC pattern in our LEED image  
80 (Supplementary Fig.1c), this scenario seems unlikely. Second, we would expect graphene bilayer

81 growth with Se or W intercalation, which is also not observed. Finally, there is no core level  
 82 energy shift of SiC peaks after the growth of  $\text{WSe}_2$ <sup>6</sup>, which demonstrates the band alignment at  
 83 the graphene/SiC interface (band bending of p-n junction) is not influenced by the top layer. These  
 84 observations rule out a significant contribution of W or Se intercalation to the graphene's doping  
 85 level. Therefore, we conclude on a static charge transfer from graphene to  $\text{WSe}_2$  is the major  
 86 contribution to the modification of the doping of graphene.

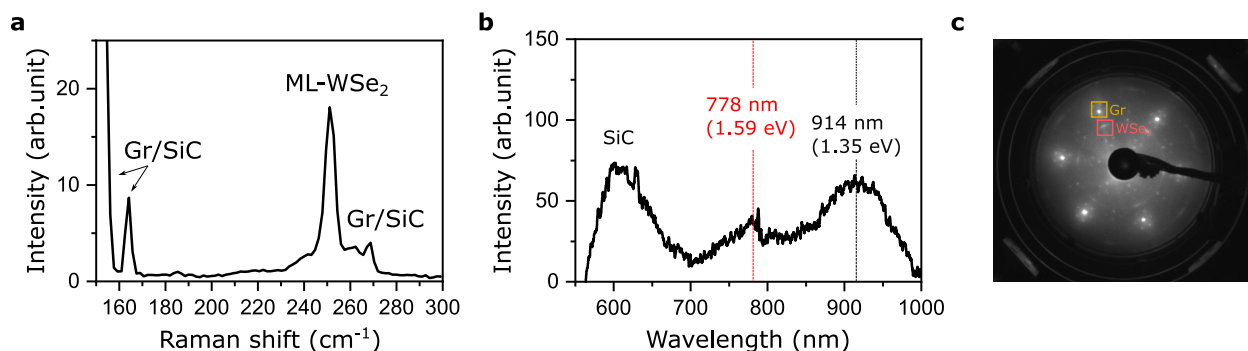

87

88 **Supplementary Fig. 1: Optical characteristics and surface analysis of the heterostructure**

89 **sample. a**, Raman measurement of  $\text{ML-WSe}_2/\text{graphene}$  (Gr) at room temperature. An  
 90 intense peak at  $250\text{ cm}^{-1}$  belongs to  $\text{ML-WSe}_2$ , whereas other peaks belong to the Gr/SiC  
 91 substrate. **b**, Photoluminescence measurement of the  $\text{ML-WSe}_2/\text{Gr}$  heterostructure. The  
 92 peak originating from the A-exciton of  $\text{ML-WSe}_2$  is marked with the dashed red line. **c**,  
 93 LEED pattern of the  $\text{ML-WSe}_2/\text{Gr}$  heterostructure at 95 eV after annealing.

94 **Delayed population rises at  $K_{\text{WSe}_2}$  and  $Q_{\text{WSe}_2}$  with the below-bandgap excitation**

95 Upon 1.2 eV excitation, the time trace at the  $K_{\text{Gr}}$  points shown in Fig.2f is by fitting with a

96 single exponential decay function convolved with the instrument response function (IRF),  $I(t) =$   
 97  $H(t - t_0) \times (A \cdot \exp(-(t - t_0)/\tau) + C) \otimes \text{IRF}$ . Here,  $H(t)$  is the Heaviside step function, IRF is  
 98 Gaussian envelope function,  $A$  is the amplitude and  $C$  is the offset. In contrast, as the  $K_{\text{WSe}_2}$  and  
 99  $Q_{\text{WSe}_2}$  valleys are populated by interlayer charge transfer (ICT) processes, the corresponding time  
 100 traces are fitted with an exponential growth function to describe the ICT process adding with a  
 101 single exponential decay for relaxation. The delayed population rise between graphene and  $\text{WSe}_2$ ,  
 102  $\Delta t = 51 \pm 9$  fs, is obtained by taking the time difference between the peak at  $K_{\text{Gr}}$  and the time  
 103 delay when the population at the  $K_{\text{WSe}_2}$  valley reaches its maximum.

#### 104 Exclusion of two/multiple-photon absorption in $\text{WSe}_2$

105 Upon 1.2 eV excitation, we could rule out the two/multiple-photon absorption of  $\text{WSe}_2$  based  
 106 on three experimental observations. First, we find no excited state population of  $\text{WSe}_2$  in the energy  
 107 range higher than the conduction band minimum from 1.0 to 2.5 eV as shown in Supplementary  
 108 Fig.2a. The valence band maximum of  $\text{WSe}_2$  is identified at  $E - E_F = -1.1$  eV by the EDC  
 109 analysis in Fig.3d (main text). In the scenario of two-photon absorption, the photo-induced carriers  
 110 would be directly populated at  $E - E_F = 1.3$  eV. This direct optical excitation is not observed in our  
 111 measurement. The three-photon absorption, corresponding to the excitation at  $E - E_F = 2.5$  eV,  
 112 is more difficult to happen and is neither observed. Second, the delayed population rise in  $K_{\text{WSe}_2}$   
 113 and  $Q_{\text{WSe}_2}$  valleys compared to the rise of hot carriers in graphene, as shown in Fig.2f (main text),  
 114 is strong evidence of the absence of the direct optical excitation in  $\text{WSe}_2$ . The hot carrier rise in  
 115 graphene demonstrates the arrival of the pump pulse. However, the excited-state population of the

116 WSe<sub>2</sub> layer appears  $\sim 50$  fs after the pump excitation. Finally, by integrating the photoemission  
 117 intensity, we present the population dynamics of electron (ROI<sub>1</sub> in Supplementary Fig.2a) and hole  
 118 components (ROI<sub>2</sub> in Supplementary Fig.2a) in WSe<sub>2</sub> upon 1.2 eV excitation. Different from the  
 119 hot electron dynamics (blue curve in Supplementary Fig.2b), the intensity of holes (red curve in  
 120 Supplementary Fig.2b) stays constant without any signature of optical excitation. The absence  
 121 of hole dynamics could also be explained by an ultrafast interlayer hole transfer on a time scale  
 122 much shorter than our temporal resolution. However, combined with the first two observations,  
 123 we exclude the occurrence of two/multiple photon absorption. With near-resonant excitation, the  
 124 two-photon absorption is also excluded since no excited-state population is found at  $E - E_F = 2.0$   
 125 eV, which corresponds to the energy of excited-state electrons by absorbing two pump photons.

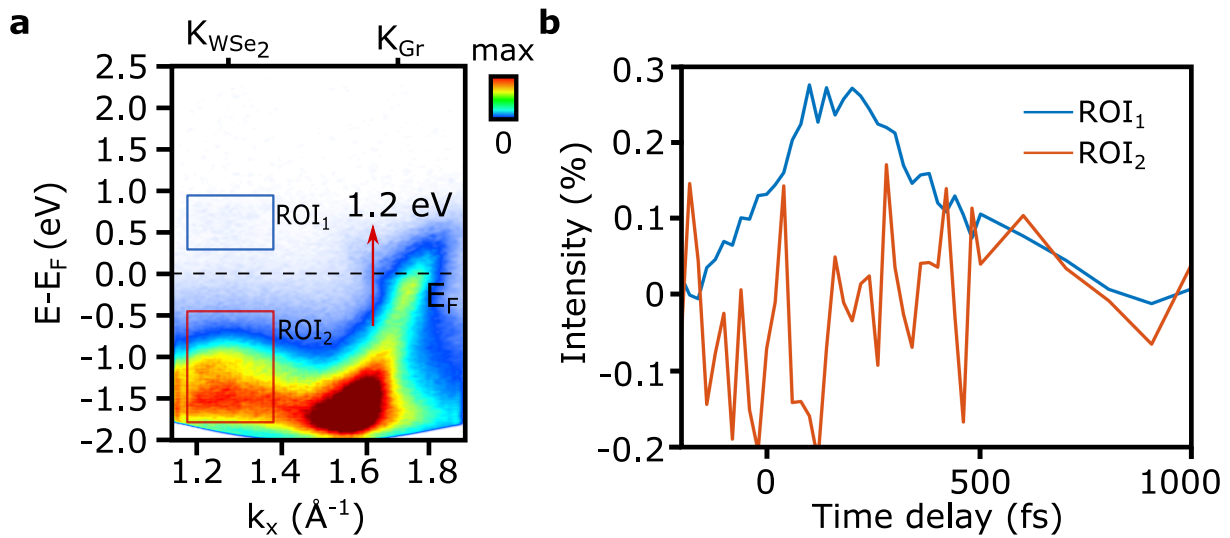

127 **Supplementary Fig. 2: Carrier dynamics upon the below-bandgap excitation a,**  
 128 **Two dimensional energy-momentum cut with 1.2 eV pump. b, By integrating the photoemission**  
 129 **intensity in ROI<sub>1</sub> and ROI<sub>2</sub> in a, the population dynamics of electrons (blue curve) and**



130 holes (red curve) are extracted, respectively. The conduction band of  $\text{WSe}_2$  is filled  
131 via interlayer hot electron injection. The population of holes stay constant without the  
132 signature of optical excitation. The time traces are normalized to total photoemission  
133 intensity at negative time.

#### 134 Identification of the Fermi level and distribution of excited-state carriers at $K_{\text{WSe}_2}$

135 In both experiments, the energy axis calibration has been performed using the position of the Fermi  
136 level of graphene, which is obtained from the energy distribution curve (EDC) at the Dirac point  
137 of graphene (Supplementary Fig. 3a and d). Before optical excitation, the EDCs at the  $K_{\text{Gr}}$  point  
138 (Supplementary Fig. 3b,e) are fitted with a Fermi-Dirac distribution function at 300 K convolved  
139 with the IRF ( $\sim 150$  meV FWHM) determined by the energy resolution of the spectrometer and the  
140 bandwidth of the probe pulses<sup>7</sup>. The chemical potentials are set to be zero for both experimental  
141 conditions to remove the XUV-probe-induced space charging effect in each measurement. The  
142 EDCs in Supplementary Fig. 3b,e are integrated over a momentum window,  $\Delta k = 0.1 \text{ \AA}^{-1}$  and  
143 selected at negative time delay. Based on the energy reference obtained from the Fermi level fits,  
144 the energy positions of the conduction band minima at the  $K_{\text{WSe}_2}$  point can be obtained from EDCs  
145 showing the excited state carrier distributions of  $\text{WSe}_2$  upon resonant and off-resonant excitation  
146 as displayed in Supplementary Fig. 3c and f, respectively. The photoemission intensity has been  
147 normalized by the total electron count of the spectrum. The energy difference of the carrier  
148 distribution, more specifically, the smaller kinetic energy of excited carriers with 1.55 eV pump,  
149 arises from the exciton formation upon the resonant excitation. By fitting with a single Gaussian

150 lineshape on top of an empirical second-order polynomial background, the energies of excited-state  
 151 carriers are extracted as 0.63 eV upon the resonant A-exciton excitation (Supplementary Fig. 3c)  
 152 and 0.73 eV upon the below-bandgap excitation (Supplementary Fig. 3f). The background has  
 153 been removed in the main text (side figures in Fig. 3a-b).

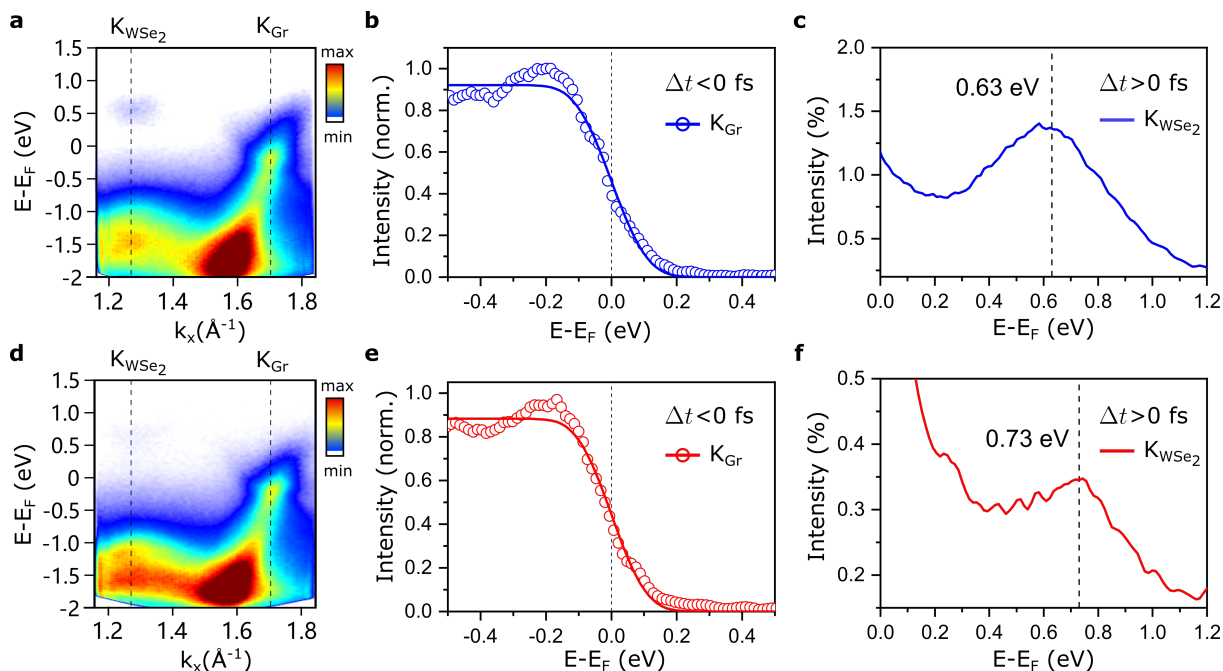

154

155 **Supplementary Fig. 3: Fermi level calibration.** **a,d**, The 2D photoemission intensity  
 156 spectra as a function of energy and momentum at time zero with 1.55 eV and 1.2 eV  
 157 pump, respectively. **b,e**, EDCs of  $K_{Gr}$  at negative time delay fitted with a Fermi-Dirac  
 158 distribution convolved with the energy IRF for 1.55 eV and 1.2 eV pump, respectively. The  
 159 chemical potentials are aligned to zero by rigidly shifting the energy axis in both cases.  
 160 **c, f** EDCs at  $K_{WSe_2}$  integrated within the first 100 fs obtained with 1.55 eV and 1.2 eV  
 161 pump, respectively. The dashed lines represent the center of the excited-state carrier  
 162 distributions extracted by a fitting procedure (see text).

163 **Identification of the Dirac point energy**

164 To identify the energy position of the Dirac point, we selected an energy- $k_y$  cut ( $\Delta t < 0$  fs)  
 165 at Dirac point and along the green dashed line in Supplementary Fig. 4a. The small titling angle  
 166 allows us to see both valence bands clearly in Supplementary Fig. 4b. We track the graphene  
 167 valence band dispersion by fitting the momentum distribution curves of occupied bands with two  
 168 Voigt lineshape functions. Then, each graphene valence band is fitted to a linear dispersion and the  
 169 Dirac point is estimated at the intersection of two lines (red and black),  $E - E_F = -0.10 \pm 0.05$  eV,  
 170 in a reasonable agreement with the previous characterization of similar heterostructures<sup>6</sup>. This  
 171 energy/momentum cut is different than the one presented in the main text (Fig.3) along the  $\Gamma$ -K  
 172 direction, which is featured by the suppression of one side of the cone due to photoemission matrix  
 173 element effects (sublattice interference)<sup>8</sup>. In the main text, we choose this cut direction because it  
 174 allows us to clearly resolve the excited state dynamics from both layers.

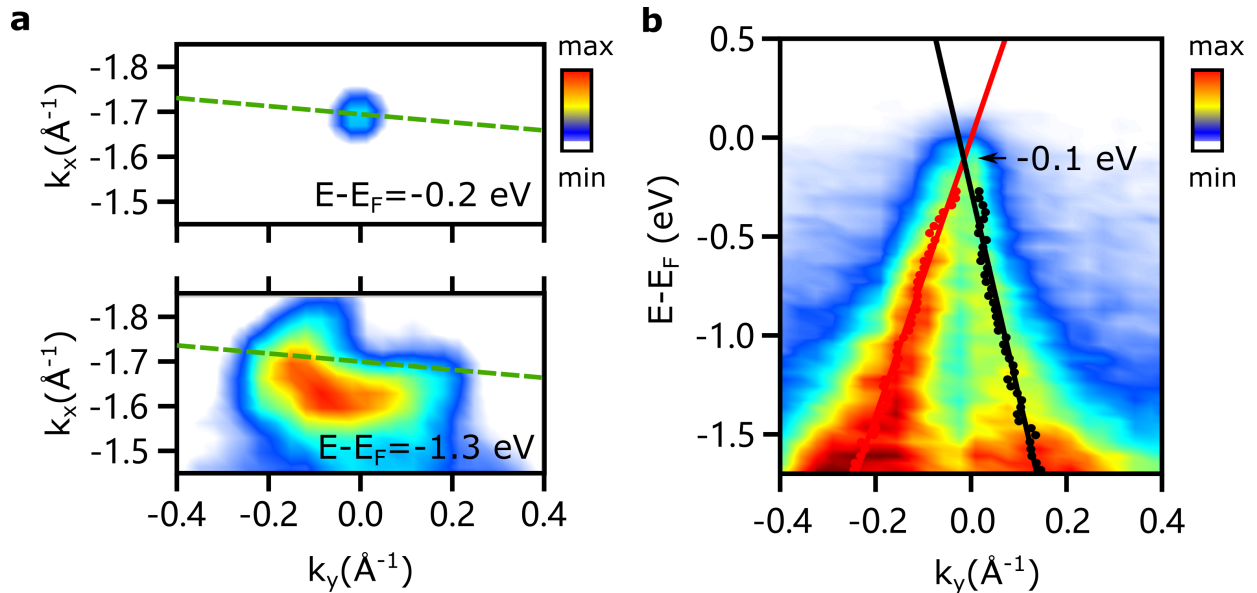

175

176 **Supplementary Fig. 4: Experimental determination of the Dirac energy.** **a**, 2D  
177 momentum distribution map  $I(k_x, k_y)$  at  $E - E_F = -0.2$  eV and  $E - E_F = -1.3$  eV. At the  
178 boundary of the Brillouin zone, it shows the quasi-triangular-shaped  $\pi$  band of graphene.  
179 **b**, Energy/momentum cut  $I(E, k)$  along the green dash line in **a** showing the conical band  
180 dispersion of graphene. Red and black markers indicate the band positions extracted  
181 from momentum distribution curve fits. Lines are linear fits of the band positions, yielding  
182 the energy position of the Dirac point of  $E_D = -0.1 \pm 0.05$  eV.

### 183 Identification of the Fermi velocity

184 The Fermi velocity along  $\Gamma$ -K direction is extracted as  $v_F = (1.8 \pm 0.1) \cdot 10^6$  m/s as shown in  
185 Supplementary Fig. 5 using the same band dispersion tracking method in the above paragraph. The  
186 energy/momentum spectrum is selected at negative time delay ( $\Delta t < 0$  fs). The Fermi velocities  
187 in the direction perpendicular to  $\Gamma$ -K with a slightly tilting angle (Supplementary Fig. 4b) are  
188  $v_F = (1.1 \pm 0.1) \cdot 10^6$  m/s (red) and  $v_F = (1.5 \pm 0.1) \cdot 10^6$  m/s (black), respectively. The Fermi  
189 velocity of graphene has been found to be in the range of  $1 \cdot 10^6$  to  $3 \cdot 10^6$  m/s, depending on  
190 the dielectric constant of the environment<sup>9</sup>. For epitaxially grown heterostructures, the dielectric  
191 constant of the embedding graphene layer between the bottom substrate and top TMDC layer  
192 could be modified by the coverage sizes of TMDC layer and substrate material, as the dielectric  
193 constant is determined by  $\epsilon = (\epsilon_{top} + \epsilon_{substrate})/2$ . At the same time, the Fermi velocity is also  
194 sensitive to the graphene's doping level<sup>10</sup>. We would like to note that because of the steep band  
195 dispersion of the graphene band, the momentum of transiently excited intraband electron-hole pairs

196 is small. Therefore, it requires a relative small excitonic COM momentum  $\mathbf{Q}$  to fulfill energy and  
 197 momentum conservation, which favors the IET process.

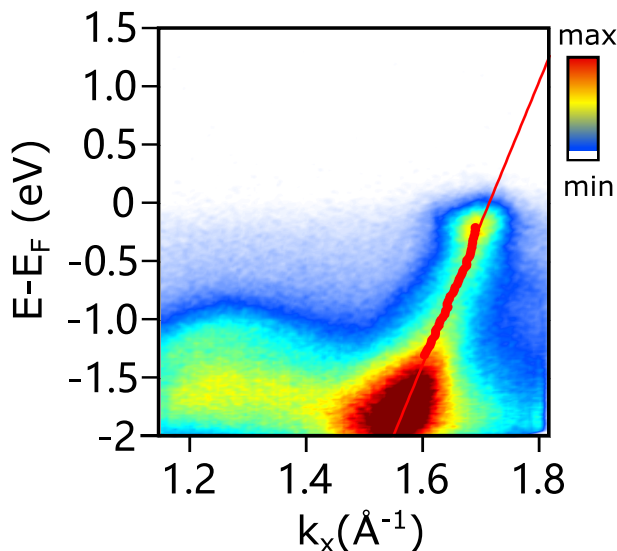

198

199 **Supplementary Fig. 5: Experimental determination of the Fermi velocity.** The  
 200 energy/momentum cut  $I(E, k)$  along  $\Gamma$ -K direction with band positions (red markers) and  
 201 the linear fit of the band dispersion (red line).

### 202 The near-unity efficiency of IET

203 To estimate the efficiency of energy transfer, we performed the same measurement (1.55 eV  
 204 excitation) on bare ML-WSe<sub>2</sub>, which is prepared by scotch-tape exfoliation and transferred on  
 205 top of thin hexagonal boron nitrid (hBN) with conductive TiO<sub>2</sub> substrate (Supplementary Fig. 6a).  
 206 The efficiency of the energy transfer process is commonly defined by the lifetime of the 'donor'  
 207 material (here WSe<sub>2</sub>) with and without the 'acceptor' material (here graphene) as:  $\eta_{ET} = (\tau_{ML} -$   
 208  $\tau_{hetero})/\tau_{ML}$ , where  $\tau_{ML}$  represents the exciton lifetime of the bare ML-WSe<sub>2</sub> and  $\tau_{hetero}$  is the

209 exciton lifetime in the WSe<sub>2</sub>/graphene heterostructure. The excited-state population dynamics at  
 210 the K<sub>WSe<sub>2</sub></sub> valley within each system are presented in Supplementary Fig. 6b. The lifetimes of  
 211 the ML sample  $\tau_{ML} = 1616 \pm 345$  fs is extracted by fitting with an exponential decay function  
 212 convolved with the IRF. The exciton lifetime of the heterostructure  $\tau_{hetero} = 67 \pm 7$  fs is obtained by  
 213 solving the system of rate equations as described in the main text. Thus, we obtain for the interlayer  
 214 energy transfer efficiency,  $\eta_{ET} = 96 \pm 1\%$ . This near-unity transfer efficiency is supported by the  
 215 underlying conservation of energy and momentum. We note that the different sample fabrication  
 216 methods of the bare ML and heterostructure may have influence on the exciton lifetime. However,  
 217 picosecond to sub-nanosecond exciton lifetimes in ML samples, consistent with our observations,  
 218 have been reported for samples fabricated with various methods<sup>11,12</sup>. Therefore, we believe that the  
 219 comparison with the exciton lifetimes in the bare ML WSe<sub>2</sub> sample provides a reasonable estimate  
 220 of the transfer efficiency.

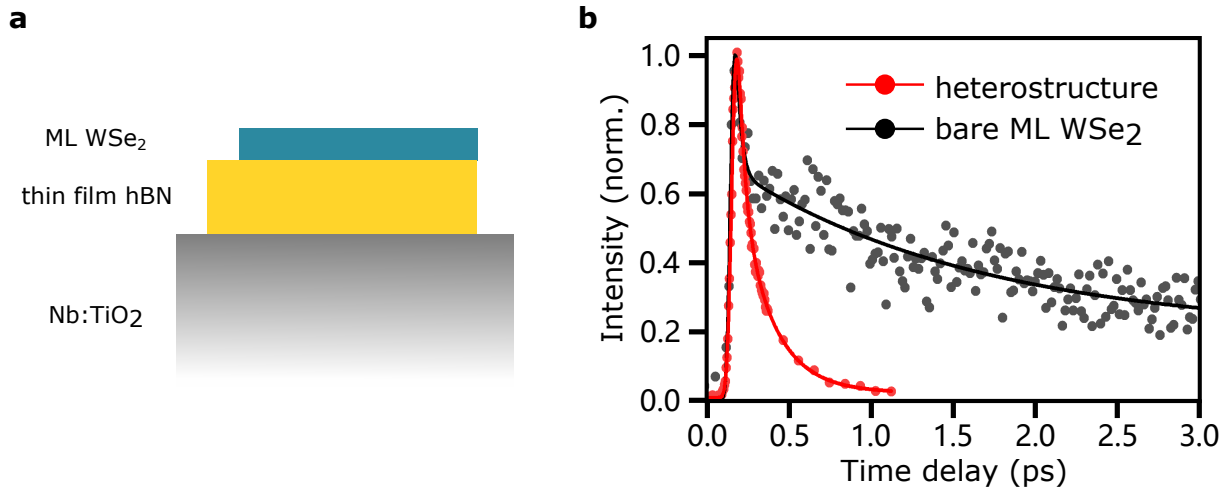

221

222 **Supplementary Fig. 6: Estimation of the IET efficiency.** **a**, Schematic of the bare  
 223 ML-WSe<sub>2</sub> sample (blue slab) with the bottom hBN layer (yellow) mounted on a Nb:TiO<sub>2</sub>

224 substrate (grey). **b**, Time traces of the excited-state carriers at the  $K_{\text{WSe}_2}$  valleys of the  
225 bare ML sample (black) and heterostructure (red) sample, respectively.

### 226 Valence bands shifting and broadening effects

227 After photoexcitation, we observe shifting and broadening effects of the  $\text{WSe}_2$  valence band as  
228 shown in the 2D difference spectrum (Fig. 3c) and EDCs at  $K_{\text{WSe}_2}$  (Fig. 3d). To extract the transient  
229 lineshape, we fit the EDC of the top two VBs (VB1 and VB2) with two Gaussian functions on  
230 top of an empirical second-order polynomial background (BG),  $I(E) = A_1 \cdot \exp(-\frac{(E-E_1)^2}{2\omega_1^2}) +$   
231  $A_2 \cdot \exp(-\frac{(E-E_2)^2}{2\omega_2^2}) + \text{BG}$ , where  $E_1$ ,  $E_2$  are peak positions and  $\omega_1$ ,  $\omega_2$  are the peak width.  
232 Supplementary Fig. 7a-d present representative fitting results at four time delays,  $\Delta t < 0$  fs,  
233  $\Delta t = 0$  fs,  $\Delta t = 200$  fs and  $\Delta t = 1000$  fs. Because of the large spectral overlap between VB1 and  
234 VB2, the fitting is performed with the same shifting,  $\Delta E_1(t) = \Delta E_2(t)$ , and broadening parameter  
235 ,  $\Delta\omega_1(t) = \Delta\omega_2(t)$ , for the two peak functions, assuming the VBs respond to the interfacial  
236 coupling and the excitation-induced modification in the same way. The extracted time dependent  
237 peak shift and linewidth parameter are shown in Supplementary Fig. 7e and f, respectively. The  
238 error bars are confidence interval of the band fitting process. The band shifting reflects the electronic  
239 band gap renormalization due to the ICT-induced hot electrons<sup>13,14</sup>. Thus, a relative time delay can  
240 be observed compared with the excited-state population dynamics in the conduction bands. In  
241 contrast, the linewidth is a measure of the photohole self-energy, which depends on the many-body  
242 interactions with photoexcited carriers and phonons<sup>15</sup>. It follows more closely the transient of  
243 overall excited carriers in the system (grey dashed curve in Supplementary Fig. 7f).

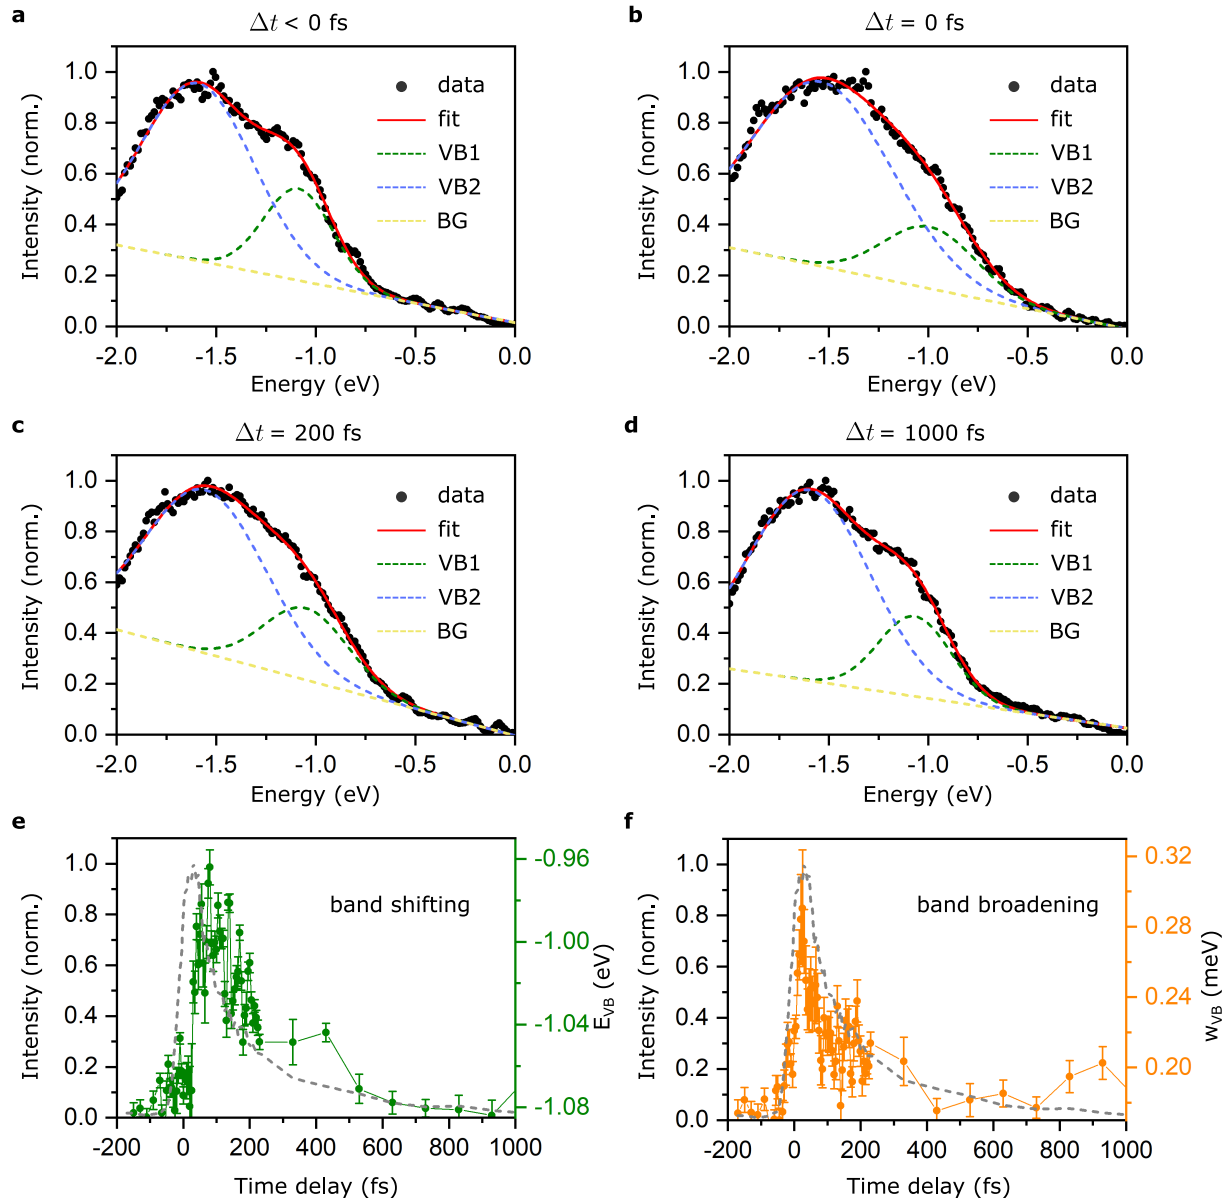

244

245 **Supplementary Fig. 7: Transient lineshape of the valence bands of  $WSe_2$ .** a-d,  
 246 The EDCs at the  $K_{WSe_2}$  valley present the spectral features of the first two valence bands  
 247 at selected time delays,  $\Delta t < 0$  fs,  $\Delta t = 0$  fs,  $\Delta t = 200$  fs and  $\Delta t = 1000$  fs. The EDCs  
 248 are fitted with two Gaussian functions describing VB1 (green dashed curve) VB2 (blue  
 249 dashed curve). The second-order polynomial background is shown as yellow dashed



250 lines. **e**, Transient peak position of VB1 (green). **f** Peak linewidth both of VBs as function  
251 of time (yellow). The population dynamic of excited-states in the  $WSe_2$  conduction band  
252 (grey) is shown in **e-f** as a reference. The error bars are confidence interval of band fitting.

253

### 254 Meitner-Auger type IET-induced hot electrons near the Fermi level

255 The Meitner-Auger-like interlayer energy transfer involves an intraband excitation of the  
256 deep-lying valence electrons to the photo-generated hot holes below the Fermi level. We observe  
257 the deep-lying hot holes, as shown in Fig.3e(main text). However, to separate the contribution  
258 of Meitner-Auger IET induced electrons from the photo-generated hot holes of graphene near  
259 the Fermi level requires an accurate description of the intrinsic energy-momentum dynamics in the  
260 graphene layer. The carrier dynamics in graphene after photoexcitation include multiple contributions:  
261 intraband carrier-carrier scattering, interband Auger heating, phonon-mediated cooling, and Auger  
262 recombination. These components contribute to the energy-dependent dynamics along the graphene  
263 bands<sup>16,17</sup>. This is particularly important for states close to the Fermi level, which are subject to hot  
264 carrier accumulation from the highly excited states, carrier redistribution due to the thermalization,  
265 and carrier annihilation via Auger recombination. Together with the complication of interlayer  
266 charge and energy transfer, it is very challenging to quantitatively disentangle these dynamics with  
267 our current energy and time resolution.

268 Although a quantitative separation of the IET-induced electrons from the photo-generated  
269 hot holes remains difficult, some information can be gained from the energy distribution of hot

270 carriers below and above the Fermi level in Fig.3e. In particular, comparing the near-resonant  
271 and below-bandgap excitation conditions proves insightful. The ratio of the relative intensity  
272 increase above the Fermi level ( $E - E_F = 0 - 1$  eV, red area) to the signal depletion below  
273  $E_F$  ( $E - E_F = -1 - 0$  eV, blue area),  $A_{el}/A_h$  can be regarded as a measure of the electron-  
274 hole imbalance in the system, and we find a significantly stronger imbalance  $A_{el}/A_h = 1.6$  for  
275 near-resonant excitation, compared to  $A_{el}/A_h = 1.1$  for below-bandgap excitation. This supports  
276 the occurrence of MA-type IET process. Compared with the almost identical spectral weights  
277 of electrons and holes using below-bandgap excitation, the unequal spectral areas with the 1.55  
278 eV pump demonstrate the carrier redistribution due to the strong interlayer interactions. While  
279 we would like to note that the spectral intensities are subject to photoemission matrix elements,  
280 therefore cannot be directly interpreted as electron and hole occupations. These probe-related  
281 effects can be reasonably assumed to be identical for the two excitation conditions, thus not  
282 affecting our conclusions.

### 283 Pump fluence dependent Meitner-Auger interlayer energy transfer

284 The pump fluence plays an important role on the MA-type IET process, because of the deep-  
285 lying valence electrons are excited to the photo-generated hot holes. The high pump fluence  
286 generates large density of hot holes, *i.e.*, more vacancies for IET-induced intraband transition,  
287 which benefits the MA-type interlayer coupling. On the other hand, the weak pump fluence would  
288 suppress the MA-type IET process with the reduced photo-generated hole density. To check this  
289 effect, we perform the same measurement with the near-resonant excitation (1.55 eV) but weak

290 pump fluence,  $F = 0.9 \text{ mJ/cm}^2$ , around half of the pump fluence applied in the manuscript,  
 291  $F = 1.7 \text{ mJ/cm}^2$ . We find the decreased intensity of the deep-lying hole population, as shown  
 292 in the Supplementary Fig.8. From the energy distribution curve (EDC) of graphene band with the  
 293 weak pump fluence (blue curve), a depletion signal around  $E - E_F = -1.8 \text{ eV}$  could be observed  
 294 but weaker than that with the high pump fluence.

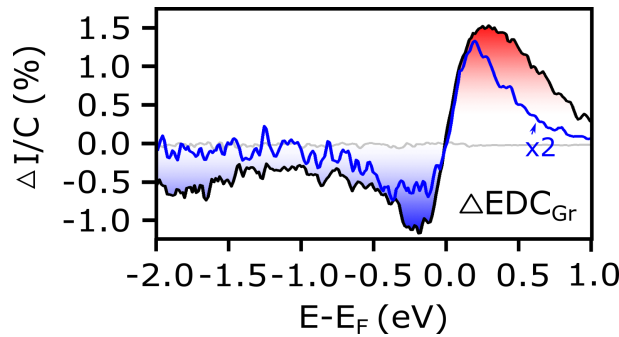

295

296 **Supplementary Fig. 8: Pump fluence dependent Meitner-Auger interlayer energy**  
 297 **transfer.** The momentum-integrated spectrum of the graphene band when pumping with  
 298 a weak pump fluence (blue). The EDC of graphene with the high pump fluence (black;  
 299 applied in the main text) is also shown as a comparison.

### 300 Doping level dependence of interlayer energy transfer process

301 As we discussed in the main text, the optical excitation prepares the hot holes near the Fermi  
 302 level, which enables the intraband transition under the mechanism of Meitner-Auger-type IET. The  
 303 doping level of graphene plays an essential role in the energy position of the photo-generated hot  
 304 holes, therefore, influencing the MA-type IET. To clarify the influence of the doping level, we  
 305 calculate the Meitner-Auger type transfer rate by increasing the Fermi energy to  $E_F = 0.2 \text{ eV}$ . As

306 shown in Supplementary Fig.9a, a dramatically suppression of the Meitner-Auger IET is observed  
 307 with the transfer rate on the order of  $0.06 \cdot 10^{-3}$  meV, much smaller than that of 3 meV based  
 308 on our real sample system. Compared with the Förster-type coupling (Supplementary Fig.9c), the  
 309 maximum of the transfer rate is even larger than that of the MA-type coupling.

310 However, we would like to note that MA-type IET could also happen in the conduction  
 311 bands with the n-doped graphene composition. The natural doping in the graphene layer provides  
 312 electrons in the conduction band, below the Fermi level and above the Dirac point. After compensating  
 313 with the photo-generated hot holes near the Fermi level, the net electron population could be  
 314 excited to highly excited states via the MA-type IET process. By adding the equation of motion  
 315 for the conduction band electron occupation, we find a rate of the MA transfer in the conduction  
 316 band as follows.

$$\Gamma_{\mathbf{Q}} = |W_{\mathbf{Q}}|^2 \frac{4}{\hbar v_F} \left( Q - \frac{E_{\mathbf{Q}}}{\hbar v_F} \right) \left( f_{Q - \frac{E_{\mathbf{Q}}}{\hbar v_F}}^c - f_{\mathbf{Q}}^c \right) \theta \left( Q - \frac{E_{\mathbf{Q}}}{\hbar v_F} \right) \quad (1)$$

317 with  $f_{\mathbf{k}}^c = (\exp(\hbar v_F |\mathbf{k}| - \mu) / k_B T) + 1)^{-1}$  and chemical potential  $\mu$ . It is similar to the transfer rate  
 318 in the valence band (details see section 'Meitner-Auger-like energy transfer'), but with the electron  
 319 occupation  $f_{\mathbf{k}}^c$  in the conduction band.

320 As shown in Supplementary Fig.9b. the maximum transfer rate reaches 1.6 meV. Therefore,  
 321 although the Förster-type IET is faster than the intraband transition in the valence band, the MA-  
 322 type IET in the conduction band is the dominant process with highly n-doped graphene. All the

323 calculations are performed at room temperature.

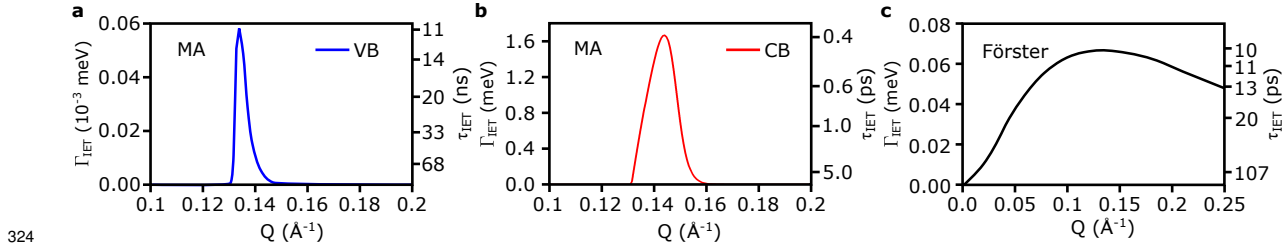

325 **Supplementary Fig. 9: Energy transfer rate of a heretostructure with the highly**  
 326 **n-doped graphene. a-b,** The calculated Meitner-Auger transfer rate with  $E_F = 0.2\text{eV}$   
 327 in the valence band and conduction band, respectively. **c,** The calculated Förster-type  
 328 transfer rate in the same condition.

329 **Band structure visualization with contrast-enhancement**

330 Fig.1b in the main text shows the three-dimensional data in an artistic isometric representation.  
 331 The data shown in Fig.2a-d were treated with a contrast-enhancing algorithm to emphasize the  
 332 band dispersion. The underlying dataset is the same for all these figures. In Fig.1b, we present  
 333 the original photoemission spectrum showing the 3D band structure of the heterostructure. The  
 334 linearly dispersing valence bands of graphene are emphasized by blue lines. The high symmetry  
 335 points  $K_{Gr}$  are clearly visible in the iso-energy map shown in the top. Here, we would like to  
 336 emphasize that due to the isometric representation, it might appear as though the  $\Gamma_{WSe_2}$  point  
 337 is energetically higher than the  $K_{WSe_2}$  point. To illustrate this and the effect of the contrast  
 338 enhancing algorithm employed for the data shown in Fig.2, Supplementary Fig.10 shows the  
 339 energy-momentum cut of the original data at a negative time delay of  $\Delta t = -400\text{ fs}$  represented as

340 Fig. **2a** in the main text with and without the contrast enhancement. Due to matrix element effects,  
341 the photoemission intensity is inhomogeneously distributed across the Brillouin zone (Supplementary  
342 Fig.10a), making it difficult to visualize the band structure. Therefore, we reduced the intensity  
343 modulation in band dispersion by using a multidimensional extension of the contrast limited  
344 adaptive histogram equalization (MCLAHE) algorithm<sup>18,19</sup>. The MCLAHE algorithm adjusts the  
345 local image contrast, decreasing the intensity inhomogeneities without changing the band structure.  
346 The contrast-enhanced band mapping provides better visualization of the band structure, as shown  
347 in Supplementary Fig.10b. With the contrast-enhancement, both sides of the valence bands of  
348 graphene are visible in Fig. **2a-d**.

349 Meanwhile, we show energy distribution curves (EDCs) at both high symmetry points in  
350 Supplementary Fig.10a in the left panel, to clarify the valence band offset between the  $\Gamma_{\text{WSe}_2}$  and  
351 the  $K_{\text{WSe}_2}$  point. By fitting the EDCs with Gaussian shape functions on top of an empirical second-  
352 order polynomial background, the peak position of the top valence band at  $K_{\text{WSe}_2}$  is obtained at  
353  $E - E_F = -1.1$  eV, higher than that at  $\Gamma_{\text{WSe}_2}$  with the energy of  $E - E_F = -1.55$  eV. The  
354 valence band maximum at the  $K_{\text{WSe}_2}$  valley confirms the monolayer thickness of the  $\text{WSe}_2$  layer, as  
355 predicted by theoretical calculations<sup>20,21</sup> and observed in the previous ARPES measurements<sup>22,23</sup>.  
356 As mentioned above, the 3D band structure surface in Fig. **1b** was quarter cut open and titled  
357 forward to show the band dispersion inside the Brillouin zone in an isometric representation. This  
358 perspective drawing and the relatively intense photoemission signal at the  $\Gamma_{\text{WSe}_2}$  point may have  
359 caused the confusion about the energy offset between  $\Gamma_{\text{WSe}_2}$  and  $K_{\text{WSe}_2}$ .

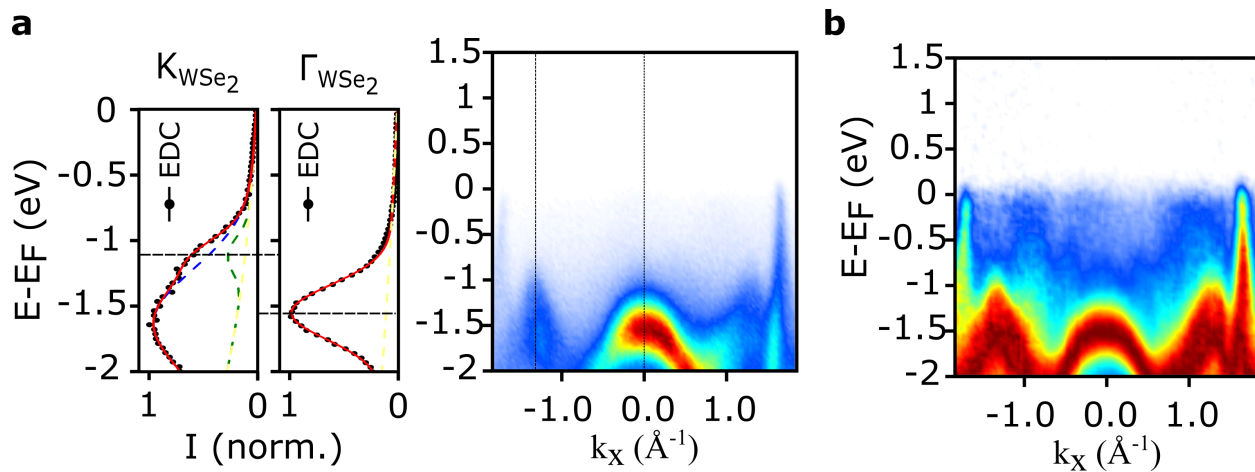

360

361

362 **Supplementary Fig. 10: Contrast-enhanced band structure.** **a**, The energy-momentum  
 363 cut of the original photoemission signal at a negative time delay. The EDCs of the valence  
 364 bands at  $\Gamma_{WSe_2}$  and  $K_{WSe_2}$  are shown in the left panel figures, respectively. The energy  
 365 positions of valence band maxima are emphasized with dashed black lines. **b**, The  
 366 contrast-enhanced band structure from the original data.

## 367 Supplementary Methods

### 368 Characteristics of pump beams

369 In this work, we use two different pump beams which wavelengths are centred at 800 nm  
370 and 1030 nm, respectively (Supplementary Fig. 11). The pulse duration of 1030nm pump line is  
371  $\sim 200$  fs FWHM, while the transform-limited pulse duration of 800 nm pump is  $\sim 35$  fs FWHM.  
372 In the measurement, the pump fluence of 800 nm is  $F_{800} = 1.7$  mJ/cm<sup>2</sup> and that of 1030 nm  
373 is  $F_{1030} = 5.3$  mJ/cm<sup>2</sup>, with the consideration of effective pump-probe overlap profile based  
374 on the formula,  $a = \frac{1}{\pi(\omega_{pump}^2 + \omega_{probe}^2)}$ , in the work of Harb *et al*<sup>24</sup>. The beam size of the pump is  
375  $\omega_{pump} = 248 \pm 20$   $\mu$ m and that of probe pulse is  $\omega_{probe} = 80 \pm 5$   $\mu$ m. Here,  $\omega_{pump}$  and  $\omega_{probe}$  are  
376 the respective beam widths of the pump and probe beams.

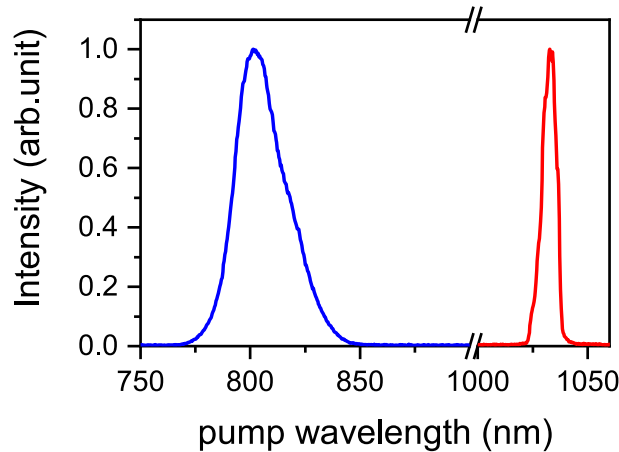

377

378 **Supplementary Fig. 11: Pump spectra.** Excitation spectra of the two light sources  
379 used for pumping as a function of wavelength.



380 Separating the interlayer charge and energy transfer by a rate equation model

381 As discussed in the main text, we observed the photoemission signatures of both ICT and IET  
 382 upon resonant A-exciton excitation. To extract the corresponding transfer rates,  $\Gamma_{ICT}$  and  $\Gamma_{IET}$ ,  
 383 we develop a multi-state coupled rate equation model describing the interlayer charge and energy  
 384 flow, as well as the hot carrier relaxations. In Fig.4a, the time trace of hot carriers in the CBM  
 385 of WSe<sub>2</sub> (black curve) includes the dynamics of photo-generated excitons  $N_T^{ex}$  and ICT-induced  
 386 quasi-free electrons  $N_T^{el}$ . The VB1 shifting (green curve in Fig.4a) mainly reflects the dynamic  
 387 of  $N_T^{el}$ . Therefore, it provides the possibility to disentangle the dynamics of these two kinds of  
 388 quasiparticles. Here, subscript  $T$  represents TMDC. Simultaneously, the deep valence band holes  
 389 in graphene  $N_{Gr}^h$  are populated by the IET process and recombine with the rate  $\Gamma_h$ , as shown in  
 390 Fig.4b. Finally, the dynamics of hot electrons in graphene  $N_{Gr}^{el}$  contains the ICT-induced charge  
 391 flow (input and output towards WSe<sub>2</sub>) and a decay process with the rate of  $\Gamma_{el}$ . With these  
 392 considerations, the complete dynamics across the interface can be described with the following  
 393 set of coupled rate equations:

$$\dot{N}_T^{ex} = -\Gamma_{IET}N_T^{ex} + S(t) \quad (2)$$

$$\dot{N}_T^{el} = -\Gamma_{ICT}N_T^{el} + \Gamma_{ICT}N_{Gr}^{el} \quad (3)$$

$$\dot{N}_{Gr}^{el} = +\Gamma_{ICT}N_T^{el} - \Gamma_{ICT}N_{Gr}^{el} - \Gamma_{el}N_{Gr}^{el} + S(t) \quad (4)$$

$$\dot{N}_{Gr}^h = -\Gamma_hN_{Gr}^h + \Gamma_{IET}N_T^{ex} \quad (5)$$

394 Here,  $S(t)$  represents the optical excitation as a Gaussian-shaped pump envelope function.  
 395 By numerically solving the system of coupled differential equations, and a global fit of the solution  
 396 to the data, we obtain the IET transfer time  $\tau_{IET} = 67 \pm 7$  fs, and the ICT transfer time  $\tau_{ICT} =$   
 397  $118 \pm 18$  fs ( $\tau = \hbar/\Gamma$ ). At the same time, we get the relaxation times of electrons in graphene,  
 398  $\tau_{Gr}^{el} = 84 \pm 7$  fs, and that of the deep valence holes,  $\tau_{Gr}^h = 7 \pm 4$  fs. The fitting results are shown  
 399 in Fig.4a and b.

#### 400 Microscopic calculation of IET mechanisms

401 We perform microscopic calculations of the IET process mediated by the Meitner-Auger, Förster  
 402 and Dexter type mechanisms.

403 **Meitner-Auger-like energy transfer** A schematic illustration of the Meitner-Auger type (MA)  
 404 interlayer transfer is depicted in the main text in Fig.4f. Here, an exciton in the TMDC recombines  
 405 non-radiatively; its energy excites an electron deep in the valence band of graphene to states close  
 406 to the Dirac point but in the valence band.

407 Starting point for the calculation of the MA-type interlayer coupling is the Hamiltonian

$$H_F = \sum_{\mathbf{k}, \mathbf{q}, \mathbf{q}', \lambda, \lambda', \nu, \nu'} V_{\mathbf{k}, \mathbf{q}, \mathbf{q}', \mathbf{k}'}^{\lambda \nu \nu' \lambda'} \lambda_{\mathbf{k}}^\dagger \nu_{\mathbf{q}}^\dagger \nu'_{\mathbf{q}'} \lambda'_{\mathbf{k}'}. \quad (6)$$

408 As a convention, we use  $\lambda^{(\prime)}$  as band indices and  $\mathbf{k}^{(\prime)}$  as momenta in WSe<sub>2</sub> layer and  $\nu^{(\prime)}$  as  
 409 band indices and  $\mathbf{q}^{(\prime)}$  as momenta in graphene. The appearing matrix element is formally given as

$$V_{\mathbf{k}, \mathbf{q}, \mathbf{q}', \mathbf{k}'}^{\lambda \nu \nu' \lambda'} = \int_{\mathbb{R}^3} d^3r \int_{\mathbb{R}^3} d^3r' \Psi_{\mathbf{k}}^{\lambda*}(\mathbf{r}) \Psi_{\mathbf{q}}^{\nu*}(\mathbf{r}') V(\mathbf{r}, \mathbf{r}') \Psi_{\mathbf{q}'}^{\nu'}(\mathbf{r}') \Psi_{\mathbf{k}'}^{\lambda'}(\mathbf{r}). \quad (7)$$

410 The band indices in the TMD are restricted to interband transitions  $\lambda \neq \lambda'$  but the band indices  
 411 in graphene are taken as the valence band  $\nu = \nu' = v$ . The remaining integrals can be evaluated  
 412 within a  $\mathbf{k} \cdot \mathbf{p}$  expansion. Last we introduce exciton operators in WSe<sub>2</sub>  $P_{\mathbf{Q}}^{\mu} = \sum_{\mathbf{q}} \varphi_{\mathbf{q}}^{\mu} c_{\mathbf{q} + \frac{m_e}{m_h + m_e} \mathbf{Q}}^{\dagger} v_{\mathbf{q} - \frac{m_h}{m_h + m_e} \mathbf{Q}}$   
 413 with quantum state  $\mu$  and COM momentum  $\mathbf{Q}$ . The final Hamiltonian reads

$$H = \sum_{\mathbf{k}, \mathbf{Q}, \mu} W_{\mathbf{Q}}^{\mu} P_{\mathbf{Q}}^{\dagger \mu} v_{\mathbf{k} - \mathbf{Q}}^{\dagger} v_{\mathbf{k}} + h.c., \quad (8)$$

414 with the coupling element

$$W_{\mathbf{Q}} = \frac{1}{e} V_{\mathbf{Q}} \mathbf{d}^{cv} \cdot \mathbf{Q} \varphi^{*\mu}(\mathbf{r} = 0). \quad (9)$$

415 In the following we restrict ourselves to the lowest bound excitons  $\mu = 1s$ . From this Hamiltonian  
 416 we calculate the equation of motion for the exciton occupation in the TMD  $N_{\mathbf{Q}} = \langle P_{\mathbf{Q}}^{\dagger} P_{\mathbf{Q}} \rangle$  and  
 417 the electron occupation in the valence band of graphene  $f_{\mathbf{k}} = \langle v_{\mathbf{k}}^{\dagger} v_{\mathbf{k}} \rangle$  by exploiting Heisenberg  
 418 equation of motion.

The resulting equations of motion read

$$\partial_t N_{\mathbf{Q}} = \frac{2\pi}{\hbar} \sum_{\mathbf{k}} |W_{\mathbf{Q}}|^2 (f_{\mathbf{k}}(1 - f_{\mathbf{k} - \mathbf{Q}}) - N_{\mathbf{Q}}(f_{\mathbf{k} - \mathbf{Q}} - f_{\mathbf{k}})) \delta(\epsilon_{\mathbf{k}} - \epsilon_{\mathbf{k} - \mathbf{Q}} - E_{\mathbf{Q}}) \quad (10)$$

$$\partial_t f_{\mathbf{k}} = \frac{2\pi}{\hbar} \sum_{\mathbf{Q}} |W_{\mathbf{Q}}|^2 (f_{\mathbf{k} - \mathbf{Q}}(1 - f_{\mathbf{k}}) - N_{\mathbf{Q}}(f_{\mathbf{k}} - f_{\mathbf{k} - \mathbf{Q}})) \delta(\epsilon_{\mathbf{k} - \mathbf{Q}} - \epsilon_{\mathbf{k}} - E_{\mathbf{Q}}) \quad (11)$$

$$+ \frac{2\pi}{\hbar} \sum_{\mathbf{Q}} |W_{\mathbf{Q}}|^2 (N_{\mathbf{Q}}(f_{\mathbf{k} - \mathbf{Q}} - f_{\mathbf{k}}) - f_{\mathbf{k}}(1 - f_{\mathbf{k} - \mathbf{Q}})) \delta(\epsilon_{\mathbf{k}} - \epsilon_{\mathbf{k} - \mathbf{Q}} - E_{\mathbf{Q}}) \quad (12)$$

419 **Estimation of the decay rate of WSe<sub>2</sub> excitons** From the Boltzmann equation we can identify  
 420 the decay rate of WSe<sub>2</sub> excitons as

$$\Gamma_{\mathbf{Q}} = 8\pi \sum_{\mathbf{k}} (f_{\mathbf{k} - \mathbf{Q}} - f_{\mathbf{k}}) \delta(\epsilon_{\mathbf{k}} - \epsilon_{\mathbf{k} - \mathbf{Q}} - E_{\mathbf{Q}}), \quad (13)$$

421 where we have added a factor of 4 to account for the valley and spin degree of freedom in graphene.  
 422 Analyzing the Dirac distribution, we find that  $\mathbf{k}$  accounts for electrons close the Dirac point, and  
 423  $\mathbf{k} - \mathbf{Q}$  for electrons deep in the valence band. In order to get a simple expression for the decay  
 424 rate, we assume that the electrons close to the Dirac point have much smaller momenta than the  
 425 electrons deep in the valence band, i. e.  $\mathbf{k} \ll \mathbf{Q}$  and  $\mathbf{k} + \mathbf{Q} \approx \mathbf{Q}$ .

426 This way, the Dirac distribution and the  $\mathbf{k}$  can be evaluated analytically yielding

$$\Gamma_{\mathbf{Q}} = |W_{\mathbf{Q}}|^2 \frac{4}{\hbar v_F} \left( Q - \frac{E_{\mathbf{Q}}}{\hbar v_F} \right) \left( f_{\mathbf{Q}} - f_{\mathbf{Q} - \frac{E_{\mathbf{Q}}}{\hbar v_F}} \right) \theta \left( Q - \frac{E_{\mathbf{Q}}}{\hbar v_F} \right) \quad (14)$$

427 The rate depends on the matrix element of the MA transfer, the density of states in graphene and on  
 428 the occupation difference of the involved states in graphene which accounts for the Pauli blocking.  
 429 The heavyside function  $\theta \left( Q - \frac{E_{\mathbf{Q}}}{\hbar v_F} \right)$  accounts for the fact, that a minimal momentum is required  
 430 to fulfil the energy and momentum conservation during the intervalley transfer.

431 Fig. 4c in the main text illustrates the MA rate of WSe<sub>2</sub> excitons to graphene for the photo-  
 432 induced hole vacancies at different energy of  $\mu_{Gr}^{h*}$ . We adjusted the graphene dispersion to the  
 433 results from the ARPES measurement. From  $\tau = \hbar/\Gamma$  we find scattering times of 270 fs ( $\mu_{Gr}^{h*} =$   
 434  $-0.3$  eV), 210 fs ( $\mu_{Gr}^{h*} = -0.4$  eV), and 175 fs ( $\mu_{Gr}^{h*} = -0.5$  eV).

435 **Origin of the finite center-of-mass (COM) momentum** The MA mediated IET requires nonzero  
 436 COM momentum of the exciton. For example, the required COM momentum is  $\sim 1.3 \text{ nm}^{-1}$   
 437 as shown in Fig.4c (main text) with  $\mu_{Gr}^* = -0.3$  eV, which corresponds to a kinetic energy of  
 438 approximately 100 meV based on the effective mass of the exciton  $m_{ex} = 0.65m_e$ .<sup>25</sup> Then, where

439 does the energy (momentum) come from? In the following, we discuss the possible origins of  
 440 COM momentum of the exciton which is quantified by the kinetic energy assuming the parabolic  
 441 excitonic band dispersion.

442 At room temperature, the mean kinetic energy of the excitons is 25.6 meV which is not  
 443 enough to explain the required energy. Therefore, we calculate the temporal evolution of the  
 444 exciton energy-momentum occupation during the optical pump for detuned excitation<sup>26</sup>. The  
 445 equation of motion for the excitonic coherence in the rotating frame reads

$$\dot{P}_0(t) = \frac{1}{i\hbar} (E_0 - \hbar\omega_L - i\gamma) P_0(t) + \mathbf{d} \cdot \mathbf{E}(t), \quad (15)$$

where the first term accounts for the detuning of the excitonic transition energy  $E_0$  from the light pulse energy  $\hbar\omega_L$ .  $\gamma$  accounts for the dephasing of the excitonic coherence with contributions from radiative and exciton phonon coupling<sup>27</sup>. The last term accounts for the optical excitation with the dipole element  $\mathbf{d}$  and the exciting electric field  $\mathbf{E}(t)$ . The equation of motion for the incoherent exciton occupation reads

$$\dot{N}_{\mathbf{Q}} = \Gamma_{\mathbf{Q}}^{Form} |P_0|^2 + \sum_{\mathbf{K}} \Gamma_{\mathbf{Q},\mathbf{K}}^{in} N_{\mathbf{K}} - \sum_{\mathbf{K}} \Gamma_{\mathbf{Q},\mathbf{K}}^{out} N_{\mathbf{Q}}. \quad (16)$$

446 The first term accounts for the formation of incoherent exciton occupation from phonon induced  
 447 dephasing from the excitonic coherence. The last two terms account for the thermalization of  
 448 incoherent excitons<sup>21</sup>. The coupling element of the exciton formation reads

$$\Gamma_{\mathbf{Q}}^{Form} = \frac{2}{\hbar} \sum_{\pm, \alpha} |g_{\mathbf{Q}}|^2 \left( \frac{1}{2} \pm \frac{1}{2} + n_{\mathbf{Q}}^{\alpha} \right) \frac{\gamma}{(E_{\mathbf{Q}} - \hbar\omega_L \mp \hbar\Omega^{\alpha})^2 + \gamma^2}. \quad (17)$$

449 with the energy  $\hbar\Omega_{\mathbf{Q}}^{\alpha}$  and the occupation  $n_{\mathbf{Q}}^{\alpha}$  of phonons in the branch  $\alpha$  with momentum  $\mathbf{Q}$ . The  
 450  $\pm$  summation accounts for phonon emission/absorption processes.

451        Supplementary Fig. 12a illustrates the snapshots of the exciton occupation directly at the  
452 maximum of the pump pulse as a function of kinetic energy with selected detuning pump photon  
453 energy *above* the excitonic transition energy. The temperatures are set as room temperature for all  
454 the calculation. With increasing pump photon energy, the amount of injected excitons decreases  
455 due to the non-resonant excitation, eq. 15. However, at larger detunings, excitons occupy larger  
456 energy states due to the excess energy of the pump pulse, which is provided by acoustic and  
457 optical phonon transitions. The Supplementary Fig. 12b illustrates the exciton occupations but  
458 normalized to the maximum. Here it is even more obvious that the excitons obtain higher energies  
459 as the detuning increases. Interesting, for larger detunings two maxima can be observed, where  
460 the higher one originates from the formation of excitons via acoustic phonon scattering. The lower  
461 peak originates from the formation of excitons via optical phonon emission but also from relaxation  
462 of excitons from the higher peak via optical phonon emission.

463        Supplementary Fig. 12c illustrates snapshots of the exciton occupation directly at the maximum  
464 of the pump pulse as a function of kinetic energy for selected detunings *below* the excitonic  
465 transition energy. Similar to the previous scenario, the density of injected excitons decreases  
466 with increasing detuning due to the non-resonant excitation, eq. 15. In Supplementary Fig. 12d,  
467 the energy-dependent exciton occupations are normalized to their maximum. Interestingly, for  
468 pumping with larger negative detunings, the exciton distribution broadens such that the relative  
469 exciton occupation at large kinetic energies increases. The reason is, that for larger detunings  
470 the Lorentzian in equation 17 flattens which results in higher occupation of hot exciton at large  
471 energy range. As a consequence, for the near-resonant excitation below the excitonic transition,

472 a substantial amount of excitons is formed at energies above 100 meV which contribute to the  
473 Meitner-Auger scattering. To conclude, non-resonant excitation of the exciton, both above and  
474 below the resonance, introduce hot excitons with high kinetic energy, which are subjected to the  
475 Meitner-Auger IET.

476 In our experiment, the pump photon energy is  $\hbar\nu_{pump} = 1.55$  eV and the A-exciton transition  
477 energy is  $E_{ex} = 1.63$  eV determined by the energy difference of excited-state particles at CBM and  
478 VBM. After the photoexcitation which prepares the *coherent* excitons with zero COM momentum  
479 (Supplementary Fig. 12e), the phonon-assisted dephasing process transfers the coherent excitons  
480 to *incoherent* exciton population which gain the finite COM momenta (Supplementary Fig. 12f).  
481 This dephasing process has been observed by our previous study<sup>28</sup>. The subsequent thermalization  
482 of excitons at the excitonic states (Supplementary Fig. 12g) also contribute to the nonzero COM  
483 momenta which is already included in our calculation.

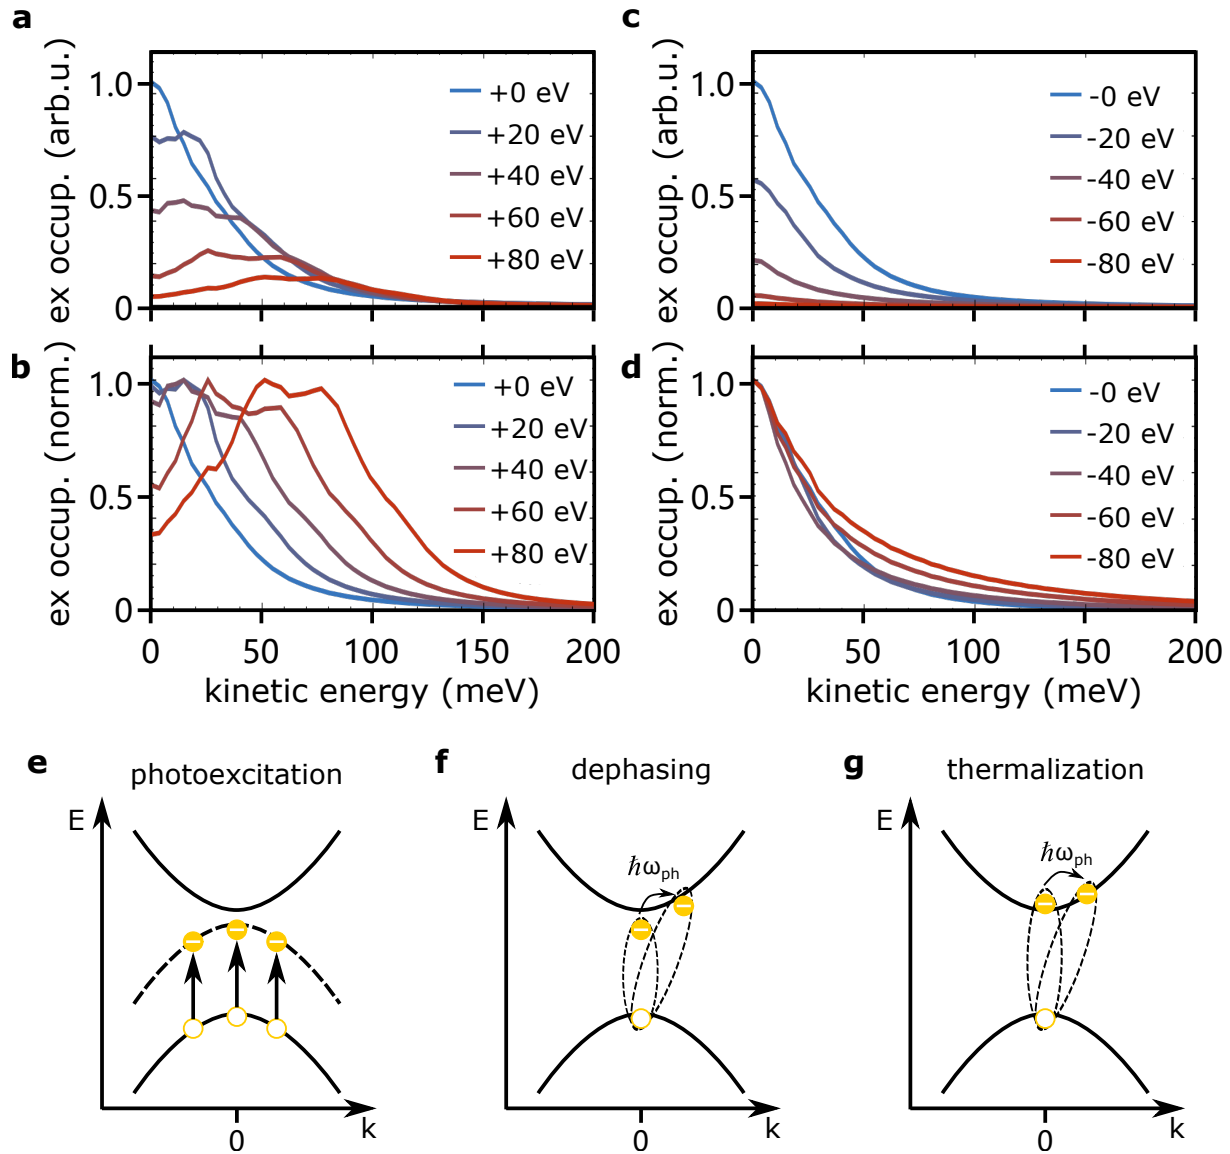

484

485 **Supplementary Fig. 12: Finite COM momentum of excitons at the  $K_{WSe_2}$  valley.**

486 **a**, The calculated energy-dependent hot exciton occupation with detuned pump photon  
 487 energy above the resonant excitonic transition energy. **b**, Normalized hot exciton distributions  
 488 in **a**. **c** The hot exciton occupation with detuned pump photon energy below the resonant  
 489 excitonic transition energy and **d** is the corresponding normalized hot exciton distributions.



490 Schematic illustrations of involved ultrafast dynamics: **e**, photoexcitation creates the coherent  
 491 exciton. The dash curve represents the coherent excitonic state. **f**, The phonon-assisted  
 492 dephasing process transfers coherent excitons to incoherent excitons, at the same time,  
 493 increases the COM momentum of excitons. **g**, The following thermalization also contributes  
 494 to the finite COM momentum.

495 **Förster coupling** To calculate the Förster rate from WSe<sub>2</sub> to graphene, we start with the Hamiltonian

$$H_F = \sum_{\mathbf{k}, \mathbf{q}, \mathbf{k}', \mathbf{q}', \lambda, \lambda', \nu, \nu'} V_{\mathbf{k}, \mathbf{q}, \mathbf{q}', \mathbf{k}'}^{\lambda \nu \nu' \lambda'} \lambda_{\mathbf{k}}^\dagger \nu_{\mathbf{q}}^\dagger \nu'_{\mathbf{q}'} \lambda'_{\mathbf{k}'}. \quad (18)$$

496 As a convention, we use  $\lambda^{(')}$  as band indices and  $\mathbf{k}^{(')}$  as momenta in WSe<sub>2</sub> layer and  $\nu^{(')}$  as  
 497 band indices and  $\mathbf{q}^{(')}$  as momenta in graphene. The appearing matrix element reads

$$V_{\mathbf{k}, \mathbf{q}, \mathbf{q}', \mathbf{k}'}^{\lambda \nu \nu' \lambda'} = \int_{\mathbb{R}^3} d^3 r \int_{\mathbb{R}^3} d^3 r' \Psi_{\mathbf{k}}^{\lambda*}(\mathbf{r}) \Psi_{\mathbf{q}}^{\nu*}(\mathbf{r}') V(\mathbf{r}, \mathbf{r}') \Psi_{\mathbf{q}'}^{\nu'}(\mathbf{r}') \Psi_{\mathbf{k}'}^{\lambda'}(\mathbf{r}). \quad (19)$$

498 Here,  $\Psi_{\mathbf{k}/\mathbf{q}}^{\lambda/\nu}$  account for the electronic Bloch waves in WSe<sub>2</sub> and graphene. The appearing Coulomb  
 499 potential shall take into account the dielectric environment of the heterostructure, including the  
 500 WSe<sub>2</sub> and graphene layer which are distanced by a gap with dielectric constant  $\epsilon_R$  and width  $z$   
 501 (closely stacked structures have  $z = 0$ )<sup>29</sup>. Additionally we take substrates below and above the  
 502 structure into account.

503 We can evaluate the matrix element by Fourier transforming the Coulomb potential and  
 504 calculating the real space integrals within a  $\mathbf{k} \cdot \mathbf{p}$  expansion<sup>30</sup>. We introduce exciton operators  
 505 in WSe<sub>2</sub>  $P_{\mathbf{Q}}^\mu = \sum_{\mathbf{q}} \varphi_{\mathbf{q}}^\mu c_{\mathbf{q} + \frac{m_e}{m_h + m_e} \mathbf{Q}}^\dagger v_{\mathbf{q} - \frac{m_h}{m_h + m_e} \mathbf{Q}}$  with quantum state  $\mu$  and COM momentum  $\mathbf{Q}$  as

506 well as pair operators in graphene  $R_{\mathbf{Q}}^{\mathbf{q}} = c_{\mathbf{q}+\frac{1}{2}\mathbf{Q}}^{\dagger} v_{\mathbf{q}-\frac{1}{2}\mathbf{Q}}$ . The Hamiltonian then reads

$$H_F = \sum_{\mathbf{Q}, \mathbf{q}, \mu} F_{\mathbf{Q}}^{\mu}(z) P_{\mathbf{Q}}^{\dagger \mu} R_{\mathbf{Q}}^{\mathbf{q}} + h.c. \quad (20)$$

507 The appearing coupling element reads

$$F_{\mathbf{Q}}^{\mu}(z) = \frac{1}{e^2 \sqrt{A}} V_{\mathbf{Q}}(z) \varphi^{\mu}(\mathbf{r} = 0) \mathbf{Q} \cdot \mathbf{d}_T^{cv} \mathbf{Q} \cdot \mathbf{d}_G^{vc} \quad (21)$$

508 with  $\mathbf{d}_T^{vc}$  the dipole element in WSe<sub>2</sub>,  $\mathbf{d}_G^{vc}$  the dipole element in graphene,  $\varphi^{\mu}(\mathbf{r})$  the excitonic  
 509 wave function in real space with quantum number  $\mu$  in WSe<sub>2</sub>. We restrict our analysis to the lowest  
 510 lying excitons  $\mu = 1s$ .

511 The Förster induced transition rate is given as <sup>31</sup>

$$\Gamma_{\mathbf{Q}}(z) = 4\pi \sum_{\mathbf{q}} |F_{\mathbf{Q}}(z)|^2 \delta(E_{\mathbf{Q}}^{\mathbf{q}} - E_{\mathbf{Q}}^{1s}), \quad (22)$$

512 where we have already added a factor of 2 to account for the electron spin in graphene. We  
 513 analytically treat the summation over the delta function, where the area which appears in equation  
 514 (21) cancels. We arrive at

$$\Gamma_{\mathbf{Q}}(z) = \frac{|F_{\mathbf{Q}}(z)|^2 A E_{\mathbf{Q}}^{1s}}{2\hbar^2 v_F^2}. \quad (23)$$

515  $v_F$  is the Fermi velocity in graphene. The area  $A$  cancels with the area in  $|F_{\mathbf{Q}}(z)|$ . In a last step  
 516 we average over the angle dependence of  $|F_{\mathbf{Q}}(z)|^2$ , and sum the result over the  $K$  and  $K'$  point in  
 517 graphene, which is already included in the  $\mathbf{q}$  summation in eq. 22. This way we arrive at the final  
 518 expression

$$\Gamma_{\mathbf{Q}}(z) = \frac{|V_{\mathbf{Q}}(z)|^2 |\varphi^{1s}(\mathbf{r} = 0)| d_T^2 d_G^2 E_{\mathbf{Q}}^{1s} Q^4}{8\hbar^2 v_F^2 e^2}. \quad (24)$$

519 The Coulomb potential  $V_{\mathbf{Q}}(z)$  is given as

$$V_{\mathbf{Q}}(z) = \frac{e^2}{\epsilon_0 |\mathbf{Q}| \epsilon_{\mathbf{Q}}(z)}, \quad (25)$$

520 where the momentum dependent dielectric function  $\epsilon_{\mathbf{Q}}(z)$  accounts for the dielectric screening  
521 from the surrounding<sup>29</sup>. As input parameters, we require the thickness of graphene and WSe<sub>2</sub>  
522 layers and their respective dielectric constants. Note, that in the limit of infinitely thin films and a  
523 uniform background, our results coincides with our previous one<sup>21</sup>. The required parameters are  
524 listed in table 1.

525 Fig. 4d in the main text illustrates the Förster transfer rate as a function of COM momentum  
526 and for different WSe<sub>2</sub> - graphene distances. For  $\mathbf{Q} = 0$  we find a vanishing Förster rate followed  
527 by a monotonous increase. The large  $\mathbf{Q}$  behavior is dictated by the interplay of the momentum  
528 dependence of the Coulomb potential and the factor  $Q^4$ . For the closest stacking, i.e. 0.0 nm we  
529 find a peak transition rate of about 0.08 meV.

Now, we would like to emphasize the difference between MA and Förster transfer theoretically. The MA and Förster transfer are related and can be derived from the same Hamiltonian since the physical origin of both mechanisms is the Coulomb interaction between the involved two-dimensional materials. However, the MA-type IET can be described as monopole-dipole interaction which is often neglected in the Coulomb potential and different from the dipole-dipole coupling term corresponding to the Förster-type IET. To illustrate this, we present the detailed derivations of Dexter, Förster, and MA transfer using a multipole expansion of the Coulomb interaction. We start from the Coulomb Hamiltonian involving the typical Coulomb matrix element. Here, we use a

simple Coulomb potential  $V(\mathbf{r} - \mathbf{r}') = \frac{e_0^2}{4\pi\epsilon_0\epsilon} \frac{1}{|\mathbf{r} - \mathbf{r}'|}$  with a constant uniform background. However, in the manuscript, we use a more complex nonlinear dielectric function valid for the TMDC-graphene interface and treat it in the momentum space. The Hamiltonian involving all transfer processes (Förster, Dexter, MA) reads

$$H = \sum_{\substack{\lambda, \lambda', \nu, \nu' \\ \mathbf{k}, \mathbf{k}', \mathbf{q}, \mathbf{q}'}} V_{\mathbf{k}, \mathbf{q}, \mathbf{q}', \mathbf{k}'}^{\lambda \nu \nu' \lambda'} \lambda_{\mathbf{k}}^\dagger \nu_{\mathbf{q}}^\dagger \nu'_{\mathbf{q}'} \lambda'_{\mathbf{k}'} \quad (26)$$

$$V_{\mathbf{k}, \mathbf{q}, \mathbf{q}', \mathbf{k}'}^{\lambda \nu \nu' \lambda'} = \int d^3 r \int d^3 r' \Psi_{\lambda, \mathbf{k}}^*(\mathbf{r}) \Psi_{\nu, \mathbf{q}}^*(\mathbf{r}') V(\mathbf{r} - \mathbf{r}') \Psi_{\nu', \mathbf{q}'}(\mathbf{r}') \Psi_{\lambda', \mathbf{k}'}(\mathbf{r}), \quad (27)$$

530 where  $(\lambda^{(\prime)}, \mathbf{k}^{(\prime)})$  stand for graphene quantum numbers and  $(\nu^{(\prime)}, \mathbf{q}^{(\prime)})$  for WSe<sub>2</sub> quantum numbers.

531 We provide now a detailed derivation of all these processes:

The spatial vector  $\mathbf{r}$  can be decomposed into a lattice vector  $\mathbf{R}_n$  pointing to the  $n$ th unit cell and a vector  $\mathbf{r}_n$  defined locally in the  $n$ th unit cell:  $\mathbf{r} \rightarrow \mathbf{r}_n + \mathbf{R}_n$ . Then the spatial integral is changed into a sum over all unit cells and an integration over one unit cell. For electronic Bloch functions of the form  $\Psi_{\lambda, \mathbf{k}} = \xi_{\mathbf{k}}(\mathbf{r}) u_{\lambda, \mathbf{k}}(\mathbf{r})$ , with lattice periodic function  $u_{\lambda, \mathbf{k}}(\mathbf{r})$  and envelope  $\xi_{\mathbf{k}}(\mathbf{r})$ , we obtain

$$V_{\mathbf{k}, \mathbf{q}, \mathbf{q}', \mathbf{k}'}^{\lambda \nu \nu' \lambda'} = \sum_{\mathbf{R}_n, \mathbf{R}'_n} \xi_{\mathbf{k}}^*(\mathbf{R}_n) \xi_{\mathbf{q}}^*(\mathbf{R}'_n) \xi_{\mathbf{q}'}(\mathbf{R}'_n) \xi_{\mathbf{k}'}(\mathbf{R}_n) \\ \times \int_{UC} d^3 r_n \int_{UC} d^3 r'_n u_{\lambda, \mathbf{k}}^*(\mathbf{r}) u_{\nu, \mathbf{q}}^*(\mathbf{r}') V(\mathbf{r}_n - \mathbf{r}'_n + \mathbf{R}_n - \mathbf{R}'_n) u_{\nu', \mathbf{q}'}(\mathbf{r}') u_{\lambda', \mathbf{k}'}(\mathbf{r}). \quad (28)$$

We assumed that the envelope is spatially constant over one unit cell and exploited the periodicity

of the functions  $u_{\lambda,\mathbf{k}}(\mathbf{r})$ . Next, we Taylor expand the Coulomb potential at two points ( $\mathbf{R}_n - \mathbf{R}'_n$ ):

$$\begin{aligned} \frac{1}{|\mathbf{r}_n - \mathbf{r}'_n + \mathbf{R}_n - \mathbf{R}'_n|} &= \frac{1}{|\mathbf{R}_n - \mathbf{R}'_n|} \\ &+ \frac{(\mathbf{R}_n - \mathbf{R}'_n)}{|\mathbf{R}_n - \mathbf{R}'_n|^3} \cdot (\mathbf{r}'_n - \mathbf{r}_n) \\ &+ \frac{\mathbf{r}_n \cdot \mathbf{r}'_n}{|\mathbf{R}_n - \mathbf{R}'_n|^3} - 3 \frac{(\mathbf{r}'_n \cdot (\mathbf{R}_n - \mathbf{R}'_n))((\mathbf{R}_n - \mathbf{R}'_n) \cdot \mathbf{r}_n)}{|\mathbf{R}_n - \mathbf{R}'_n|^5}. \end{aligned} \quad (29)$$

532 The first line is the zeroth-order and corresponds to monopole-monopole interaction between  
 533 the two parts of the heterostructure. The second line is the monopole-dipole interaction which  
 534 corresponds to an intraband-interband coupling. This term is often neglected in a rotating wave  
 535 approximation when applied to gaped structures, such as a semiconductor heterostructure. However,  
 536 in the case of graphene, this term can not be ignored since the vanishing bandgap allows energetically  
 537 favourite intraband transitions (if not Pauli-blocked). Here, a coupling of intraband excitation in  
 538 graphene and excitons in TMDCs can occur. A typical effect is carrier multiplication<sup>32,33</sup>. In our  
 539 study, we include this term which gives rise to the MA coupling, as a monopole (graphene)-dipole  
 540 (TMDC) interaction. The last line, appearing in the first order of both arguments  $\mathbf{r}_n, \mathbf{r}'_n$ , constitutes  
 541 the typical dipole-dipole interaction coupling (Förster-type transfer).

Coming back to the Hamiltonian and inserting the last line of Taylor expansion (Eq. (29))  
 into Eq. (28), we obtain the Förster-type coupling,

$$\begin{aligned} V_{\mathbf{k},\mathbf{q},\mathbf{q}',\mathbf{k}'}^{\lambda\nu\bar{\nu}\bar{\lambda}} &= \frac{1}{4\pi\epsilon_0\epsilon} \sum_{\mathbf{R}_n, \mathbf{R}'_n} \xi_{\mathbf{k}}^*(\mathbf{R}_n) \xi_{\mathbf{q}}^*(\mathbf{R}'_n) \xi_{\mathbf{q}'}(\mathbf{R}'_n) \xi_{\mathbf{k}'}(\mathbf{R}_n) \\ &\times \left( \frac{\mathbf{d}_{\mathbf{k},\mathbf{k}'}^{\lambda\bar{\lambda}} \cdot \mathbf{d}_{\mathbf{q},\mathbf{q}'}^{\nu\bar{\nu}}}{|\mathbf{R}_n - \mathbf{R}'_n|^3} - 3 \frac{\mathbf{d}_{\mathbf{k},\mathbf{k}'}^{\lambda\bar{\lambda}} \cdot (\mathbf{R}_n - \mathbf{R}'_n) \mathbf{d}_{\mathbf{q},\mathbf{q}'}^{\nu\bar{\nu}} \cdot (\mathbf{R}_n - \mathbf{R}'_n)}{|\mathbf{R}_n - \mathbf{R}'_n|^5} \right) \end{aligned} \quad (30)$$

542 with the dipole matrix elements of both materials defined as  $\mathbf{d}_{\mathbf{k},\mathbf{k}'}^{\lambda\bar{\lambda}} = e_0 \int_{UC} d^3r u_{\lambda,\mathbf{k}}^*(\mathbf{r}) \mathbf{r} u_{\bar{\lambda},\mathbf{k}'}(\mathbf{r})$

543 where  $\bar{\lambda} \neq \lambda$ . As explicitly expressed, the Förster-type transfer is referred to as a dipole-dipole  
 544 coupling.

Next, we insert the second line of Eq. (29) into Eq. (28) to investigate the MA-type coupling:

$$\begin{aligned}
 V_{\mathbf{k},\mathbf{q},\mathbf{q}',\mathbf{k}'}^{\lambda\nu\nu'\lambda'} &= \frac{e_0^2}{4\pi\epsilon_0\epsilon} \sum_{\mathbf{R}_n,\mathbf{R}'_n} \xi_{\mathbf{k}}^*(\mathbf{R}_n)\xi_{\mathbf{q}}^*(\mathbf{R}'_n)\xi_{\mathbf{q}'}(\mathbf{R}'_n)\xi_{\mathbf{k}'}(\mathbf{R}_n) \frac{(\mathbf{R}_n - \mathbf{R}'_n)}{|\mathbf{R}_n - \mathbf{R}'_n|^3} \\
 &\times \left( \int_{UC} d^3r_n u_{\lambda,\mathbf{k}}^*(\mathbf{r}_n)u_{\lambda',\mathbf{k}'}(\mathbf{r}_n) \int_{UC} d^3r'_n u_{\nu,\mathbf{q}}^*(\mathbf{r}'_n)\mathbf{r}'_n u_{\nu',\mathbf{q}}(\mathbf{r}'_n) \right. \\
 &\left. - \int_{UC} d^3r_n u_{\lambda,\mathbf{k}}^*(\mathbf{r}_n)\mathbf{r}_n u_{\lambda',\mathbf{k}'}(\mathbf{r}_n) \int_{UC} d^3r'_n u_{\nu,\mathbf{q}}^*(\mathbf{r}'_n)u_{\nu',\mathbf{q}}(\mathbf{r}'_n) \right). \quad (31)
 \end{aligned}$$

Here, the second line of Eq. (31) describes the interaction of a TMDC interband transition ( $r'_n$ -integral,  $(\nu, \mathbf{q})$  WSe<sub>2</sub> quantum numbers) and an intraband graphene transition ( $r_n$ -integral,  $(\lambda, \mathbf{k})$  graphene quantum numbers). Note, the third line of Eq. (31) describes an interband transition in the graphene layer and an intraband transition in the WSe<sub>2</sub> layer. It is not feasible in our experiment and also unlikely from theoretical considerations. Thus, we neglect this term. Finally, we obtain

$$V_{\mathbf{k},\mathbf{q},\mathbf{q}',\mathbf{k}'}^{\lambda\nu\bar{\nu}\lambda} = \frac{e_0}{4\pi\epsilon_0\epsilon} \sum_{\mathbf{R}_n,\mathbf{R}'_n} \xi_{\mathbf{k}}^*(\mathbf{R}_n)\xi_{\mathbf{q}}^*(\mathbf{R}'_n)\xi_{\mathbf{q}'}(\mathbf{R}'_n)\xi_{\mathbf{k}'}(\mathbf{R}_n) \frac{(\mathbf{R}_n - \mathbf{R}'_n)}{|\mathbf{R}_n - \mathbf{R}'_n|^3} \mathbf{d}_{\mathbf{q},\mathbf{q}'}^{\nu\bar{\nu}} \delta_{\mathbf{k},\mathbf{k}'}, \quad (32)$$

545 where we used the orthogonality of the lattice periodic functions to solve the  $r_n$ -integral. As  
 546 explicitly shown in Eq. (32), only one dipole element is involved in MA-type transfer, distinguishable  
 547 from the Förster-type dipole-dipole coupling.

548 **Distance dependence of Meitner-Auger-like and Förster-type energy transfer** To study the  
 549 distance dependence of the Meitner-Auger transfer and compare it to the known dependence of  
 550 the Förster process, we calculate MA- and Förster-type transfer rates as a function of interlayer  
 551 distance  $z$ . In Supplementary Fig. 13 we show the  $z$ -dependence of the Meitner-Auger transfer

552 and also the Förster result, from which we observe a very different behaviour at long distances.  
553 For the Förster transfer, we obtain an exponential decay ( $\exp(-z)$ ) in the near-field and the well-  
554 known  $z^{-4}$  dependence in the far-field. In contrast to the Förster transfer, the Meitner-Auger  
555 transfer decays solely exponentially. In principle, these two processes could be distinguished  
556 by the different behaviours at long distances. However, both processes decay exponentially at  
557 short distances, where they can not be distinguished. To formally study the  $z$ -dependence of both  
558 mechanisms, we assume a thermal distribution of the initial states. The corresponding  $Q$ -dependent  
559 rate is then averaged over this thermal distribution (cp. for instance, the approach of reference 14  
560 in the main text). To study the behaviour analytically, we assume a uniform dielectric environment.  
561

The detailed computations are shown in the following: The Meitner-Auger rate reads  $\Gamma_{\mathbf{Q}} = |W_{\mathbf{Q}}|^2 \frac{4}{\hbar v_F} (Q - E_{\mathbf{Q}}/\hbar v_F) (f_{\mathbf{Q}} - f_{E_{\mathbf{Q}}-Q/\hbar v_F}) \theta(Q - E_{\mathbf{Q}}/\hbar v_F)$ , where  $W_{\mathbf{Q}}$  carries a general Coulomb potential depending on the dielectric environment. In the manuscript we consider a complex non-linear dielectric function to accurately describe the two-dimensional materials on the substrate and evaluate the matrix element in momentum space. However, to have analytical insights, we assume now a Coulomb potential of the form  $V(\mathbf{r} - \mathbf{r}') = \frac{1}{4\pi\epsilon_0} \frac{1}{|\mathbf{r} - \mathbf{r}'|}$  with uniform background. We can then start from the Coulomb matrix element Eq. (32) forming  $W_{\mathbf{Q}}$  in the Meitner-Auger rate. We perform a coordinate transformation with the new coordinates  $\mathbf{s} = (\mathbf{R}_n + \mathbf{R}'_n + \mathbf{z})/2$  and  $\mathbf{S} = \mathbf{R}_n - \mathbf{R}'_n - \mathbf{z}$ . Equation (32) becomes

$$V_{\mathbf{k},\mathbf{q},\mathbf{q}',\mathbf{k}'}^{\lambda\nu\bar{\nu}\lambda} = \frac{1}{4\pi\epsilon_0\epsilon} \sum_{\mathbf{s},\mathbf{Q}} e^{-i\mathbf{Q}\cdot(\mathbf{s}+\mathbf{z})} \frac{\mathbf{s} + \mathbf{z}}{|\mathbf{s} + \mathbf{z}|^3} \delta_{\mathbf{Q},\mathbf{k}-\mathbf{k}'} \delta_{\mathbf{Q},\mathbf{q}-\mathbf{q}'} \mathbf{d}_{\mathbf{q},\mathbf{q}-\mathbf{Q}}^{\nu\bar{\nu}}. \quad (33)$$

The dipole element can be written as  $\mathbf{d}_{\mathbf{q},\mathbf{q}-\mathbf{Q}}^{\nu\bar{\nu}} = d_{\mathbf{q},\mathbf{q}-\mathbf{Q}}^{\nu\bar{\nu}} \mathbf{e}$  with polarization vector  $\mathbf{e}$ . The Hamiltonian

Eq. (26) reads

$$H = \sum_{\substack{\lambda, \nu \\ \mathbf{q}, \mathbf{Q}, \mathbf{k}}} \frac{1}{4\pi\epsilon_0\epsilon} d_{\mathbf{q}-\mathbf{Q}/2, \mathbf{q}+\mathbf{Q}/2}^{\nu\bar{\nu}} a(\mathbf{Q}, \mathbf{z}) \lambda_{\mathbf{k}+\mathbf{Q}/2}^\dagger \nu_{\mathbf{q}-\mathbf{Q}/2}^\dagger \bar{\nu}_{\mathbf{q}+\mathbf{Q}/2}^\dagger \lambda_{\mathbf{k}-\mathbf{Q}/2}^\dagger \quad (34)$$

$$\text{with } a(\mathbf{Q}, \mathbf{z}) = \int d^2s \frac{e^{-i\mathbf{Q}\cdot(\mathbf{s}+\mathbf{z})}}{|\mathbf{s}+\mathbf{z}|^3} (\mathbf{s}+\mathbf{z}) \cdot \mathbf{e} . \quad (35)$$

The integral can be solved and reads

$$a(\mathbf{Q}, z) = -2\pi i \frac{e^{-Qz}}{Q} \mathbf{Q} \cdot \mathbf{e} . \quad (36)$$

To evaluate the  $z$ -dependence of the Meitner-Auger rate, we perform a thermal average according to our previous work<sup>31</sup>:

$$\frac{1}{\tau_T} = \langle \frac{1}{\tau} \rangle_T = \frac{1}{\Omega} \int d^2Q e^{-\beta E_{\mathbf{Q}}} \frac{1}{\tau_{\mathbf{Q}}} = \frac{2}{\hbar\Omega} \int d^2Q e^{-\beta E_{\mathbf{Q}}} \Gamma_{\mathbf{Q}} \quad (37)$$

with  $\Omega = \int d^2Q \exp(-\beta E_{\mathbf{Q}})$  and  $\beta = 1/k_B T$ . To calculate the integral, we set the out-scattering and in-scattering occupation  $f_{\mathbf{Q}}$  and  $f_{E_{\mathbf{Q}}-Q/\hbar v_F}$  to one and zero, which correspond to a fairly rough approximation. The matrix element  $|W_{\mathbf{Q}}|^2$  is determined by the function  $|a(\mathbf{Q}, z)|^2 = 2\pi^2 \exp(-2Qz)$  after an angle average. The solution of the integral reads

$$\frac{1}{\tau_T} = \frac{\pi^2}{2\hbar\lambda(T)} e^{-\frac{E_{1s}(E_{1s}\lambda^2(T)+2\hbar v_F z)}{\hbar^2 v_F^2}} \left[ -2\hbar\lambda(T)v_F z + e^{\frac{(E_{1s}\lambda^2(T)+\hbar v_F z)^2}{\hbar^2 v_F^2 \lambda^2(T)}} \sqrt{\pi} (2E_{1s}\lambda^2(T)z + \hbar v_F (\lambda^2(T) + 2z^2)) \operatorname{erfc} \left( \frac{E_{1s}\lambda(T)}{\hbar v_F} + \frac{z}{\lambda(T)} \right) \right] , \quad (38)$$

562 where we introduced the thermal wavelength  $\lambda(T) = \hbar/\sqrt{2Mk_B T}$ . In Supplementary Fig. 13 we  
 563 show the  $z$ -dependence of the Meitner-Auger transfer and also the Förster result. In contrast to  
 564 the Förster transfer, the Meitner-Auger transfer decays exponentially. From the function  $a(Q, z) \propto$   
 565  $\exp(-Qz)$  we see that the main contribution stems from momenta  $Q$  at  $Q \approx 0$ . But to account



566 for energy and momentum conservation, the Meitner-Auger transfer requires large  $Q$ , ensured by  
567 the Heaviside function in  $\Gamma_Q$ . We see from the exponential function in front of the parenthesis,  
568 that the strength of the exponential decay is determined by the slope of the linear graphene band  
569 structure. For the Förster transfer the function  $a(Q, z)$  is proportional to  $Q \exp(-Qz)$  resulting  
570 in the different far-field behavior. Interestingly, the different far-field behavior can be traced back  
571 to the linear band structure of graphene, reflected by the Heaviside function in  $\Gamma_Q$ , and not to the  
572 difference in the interaction. When we artificially set the TMDC band gap to zero, the Meitner-  
573 Auger transfer shows the same  $z$ -dependence as the Förster transfer in the near- and far-field. At  
574 last, we want to stress, that to calculate Eq. (38) we assumed thermalized electron occupations in  
575 graphene, which is obviously not the case for a transient experiment.

576         Compared with a heterostructure made by the exfoliation and stacking technique, the epitaxially  
577 grown heterostructure provides a shorter interlayer distance, which benefits the interfacial energy  
578 transfer. We have identified the closely stacked WSe<sub>2</sub> and graphene layer without any significant  
579 spatial gap with atomic force microscopy in a similar heterostructure<sup>6</sup>. The  $z$ -dependence of  
580 the energy transfer rates is shown in Supplementary Fig.13. It demonstrates a larger transfer  
581 energy rate at a shorter  $z$ -distance for both MA and Förster-type IET processes. A different  
582 IET mechanism could be dominant with increased interlayer distance. However, not only the  
583 interlayer distance  $z$  determines the interlayer coupling, but also the rotational orientation between  
584 two layers. The band structure alignment of an epitaxially grown heterostructure is favoured in a  
585 few discrete orientations, for example, twisting angle of 0 deg and 60 deg between the WSe<sub>2</sub> and  
586 graphene layer. The heterostructures prepared by the exfoliation method provide the flexibility for

587 engineering the band structure alignment by turning the twisting angel. Therefore, the heterostructure  
 588 samples prepared by these methods provide their specific way for us to understand the interlayer  
 589 interaction.

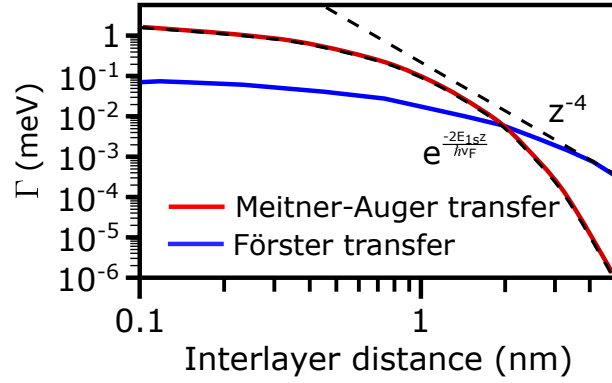

590

591 **Supplementary Fig. 13: Meitner-Auger and Förster transfer rate as function of**  
 592 **layer distance.** The Förster transfer rate decays exponentially at short distance and  
 593 goes over into a  $z^{-4}$  dependence (blue). The Meitner-Auger transfer rate continues its  
 594 exponential decay (red). The strength of the exponential decay of Meitner-Auger rate  
 595 depends on the slope of the linear graphene band structure

596 **Dexter Coupling** The IET process could also mediated by Dexter-type two-particle exchange,  
 597 whose transfer rate is determined by the wave function overlap<sup>34</sup>. Starting point for the calculation  
 598 is the Hamiltonian

$$H_D = \sum_{\mathbf{k}, \mathbf{q}, \mathbf{k}', \mathbf{q}'} V_{\mathbf{k}, \mathbf{q}, \mathbf{k}', \mathbf{q}'}^{cvvc} c_{\mathbf{k}}^\dagger v_{\mathbf{q}}^\dagger v_{\mathbf{k}'} c_{\mathbf{q}'} + h.c., \quad (39)$$

599 with the same conventions for the notation as for the calculation of the Förster transfer. The  
 600 appearing coupling element is defined as

$$V_{\mathbf{k},\mathbf{q},\mathbf{k}',\mathbf{q}'}^{cvvc} = \int_{\mathbb{R}^3} d^3r \int_{\mathbb{R}^3} d^3r' \Psi_{\mathbf{k}}^{c*}(\mathbf{r}) \Psi_{\mathbf{q}}^{v*}(\mathbf{r}') V(\mathbf{r}, \mathbf{r}') \Psi_{\mathbf{k}'}^v(\mathbf{r}') \Psi_{\mathbf{q}'}^c(\mathbf{r}). \quad (40)$$

601 The Coulomb potential is translational invariant in the in-plane direction, i.e.  $V(\mathbf{r}, \mathbf{r}') =$   
 602  $V(\mathbf{r}_{\parallel} - \mathbf{r}'_{\parallel}, z, z')$ . Fourier transforming the Coulomb potential w.r.t. the in-plane components,  
 603 writing the electronic wave functions as Bloch waves and decomposing the spatial coordinates  
 604 into one component inside the unit cell and one which addresses the unit cells  $\mathbf{r} \rightarrow \mathbf{r} + \mathbf{R}$ , yields  
 605 for the coupling element

$$V_{\mathbf{k},\mathbf{q},\mathbf{k}',\mathbf{q}'}^{cvvc} = \frac{1}{A} \sum_{\mathbf{K}} \int_{uc} dz \int_{uc} dz' \chi^c(z) \chi^v(z') V_{\mathbf{K}}(z, z') \delta_{\mathbf{k},\mathbf{q}'+\mathbf{K}} \delta_{\mathbf{q},\mathbf{k}'-\mathbf{K}}, \quad (41)$$

606 with

$$\chi^\lambda(z) = \frac{1}{V_{uc}} \int_{uc} d^2r_{\parallel} u_{TMD}^{*\lambda}(\mathbf{r}_{\parallel}, z) u_{Graphene}^\lambda(\mathbf{r}_{\parallel}, z) \quad (42)$$

607 To evaluate the coupling element further, we restrict ourselves to the case with vanishing  
 608 interlayer spacing. We decompose the  $z$  and  $z'$  integration into two integrals over WSe<sub>2</sub> and  
 609 graphene

$$\begin{aligned}
V_{\mathbf{k},\mathbf{q},\mathbf{k}',\mathbf{q}'}^{cvc} &= \frac{1}{A} \sum_{\mathbf{K}} \delta_{\mathbf{k},\mathbf{q}'+\mathbf{K}} \delta_{\mathbf{q},\mathbf{k}'-\mathbf{K}} \times \\
&\left( \int_{WSe_2} dz \int_{WSe_2} dz' \chi^c(z) \chi^v(z') V_{\mathbf{K}}(z, z') \right. \\
&+ \int_{WSe_2} dz \int_{Graphene} dz' \chi^c(z) \chi^v(z') V_{\mathbf{K}}(z, z') \\
&+ \int_{Graphene} dz \int_{WSe_2} dz' \chi^c(z) \chi^v(z') V_{\mathbf{K}}(z, z') \\
&\left. + \int_{Graphene} dz \int_{Graphene} dz' \chi^c(z) \chi^v(z') V_{\mathbf{K}}(z, z') \right) \quad (43)
\end{aligned}$$

Given that the Coulomb potential varies only weakly with each layer, we can replace the  $z/z'$  dependence by the position of the layer  $z = z_{WSe_2}, z_{Graphene}$  in the Coulomb potential. This way we arrive at

$$\begin{aligned}
V_{\mathbf{k},\mathbf{q},\mathbf{k}',\mathbf{q}'}^{cvc} &= \frac{1}{A} \sum_{\mathbf{K}} \delta_{\mathbf{k},\mathbf{q}'+\mathbf{K}} \delta_{\mathbf{q},\mathbf{k}'-\mathbf{K}} \times \\
&\left( \chi_{WSe_2}^c \chi_{WSe_2}^v V_{\mathbf{K}}(z = z_{WSe_2}, z' = z_{WSe_2}) \right. \\
&+ \chi_{WSe_2}^c \chi_{Graphene}^v V_{\mathbf{K}}(z = z_{WSe_2}, z' = z_{Graphene}) \\
&+ \chi_{Graphene}^c \chi_{WSe_2}^v V_{\mathbf{K}}(z = z_{Graphene}, z' = z_{WSe_2}) \\
&\left. + \chi_{Graphene}^c \chi_{Graphene}^v V_{\mathbf{K}}(z = z_{Graphene}, z' = z_{Graphene}) \right), \quad (44)
\end{aligned}$$

610 with

$$\chi_{WSe_2/Graphene}^\lambda = \int_{WSe_2/Graphene} dz \chi^\lambda(z), \quad (45)$$

i.e. the contribution of the wave function overlap of the band  $\lambda$  in the individual layers. Assuming, that the integration in both layers contributes equally to the wave function overlap between  $WSe_2$

and graphene in conduction and valence band, i.e.  $\chi_{WSe_2}^\lambda = \chi_{Graphene}^\lambda = \frac{1}{2}\chi^\lambda$ , we obtain the final expression for the matrix element

$$V_{\mathbf{k},\mathbf{q},\mathbf{k}',\mathbf{q}'}^{cvc} = \frac{1}{4A}\chi^c\chi^v \sum_{\mathbf{K}} \delta_{\mathbf{k},\mathbf{q}'+\mathbf{K}}\delta_{\mathbf{q},\mathbf{k}-\mathbf{K}}V_{\mathbf{K}}^{Dex} \quad (46)$$

with

$$V_{\mathbf{K}}^{Dex} = (V_{\mathbf{K}}(z = z_{WSe_2}, z' = z_{WSe_2}) + V_{\mathbf{K}}(z = z_{WSe_2}, z' = z_{Graphene}) + V_{\mathbf{K}}(z = z_{Graphene}, z' = z_{WSe_2}) + V_{\mathbf{K}}(z = z_{Graphene}, z' = z_{Graphene})). \quad (47)$$

611 Reinserting the result back into the Hamiltonian (and indexing the operators according to the  
612 layer, since due to the momentum conservation our convention breaks down) yields

$$H_D = \sum_{\mathbf{K},\mathbf{k},\mathbf{q}} \frac{1}{4A}\chi^c\chi^v V_{\mathbf{K}+\mathbf{k}-\mathbf{q}}^{Dex} c_{\mathbf{k}+\mathbf{K}}^{\dagger WSe_2} v_{\mathbf{q}-\mathbf{K}}^{\dagger Gr} v_{\mathbf{k}}^{WSe_2} c_{\mathbf{q}}^{Gr} + h.c.. \quad (48)$$

613 So far, the momenta are defined w.r.t. the  $\Gamma$  point in graphene and  $WSe_2$ . Redefining the  
614 coordinates  $\mathbf{k} \rightarrow K^W + \mathbf{k}$  and  $\mathbf{q} \rightarrow K^G + \mathbf{q}$  expresses them w.r.t. the  $K$  point in  $WSe_2$ /graphene.  
615 A projection on excitonic wave functions in  $WSe_2$  yields

$$H_D = - \sum_{\mathbf{K},\mathbf{q},\nu} \left( \frac{1}{4\sqrt{A}}\chi^c\chi^v \sum_{\mathbf{k}} \varphi_{K^W+\mathbf{k}}^{*\nu} V_{K^W-K^G+\mathbf{K}+\mathbf{k}-\mathbf{q}}^{Dex} \right) P_{\mathbf{K}}^{\dagger\lambda} R_{\mathbf{K}}^{K^G+\mathbf{q}} + h.c.. \quad (49)$$

616 In the Dexter coupling element, the momentum distance between the  $K$  points in graphene  
617 and the TMD directly enters. We have  $|K^G - K^W| \approx 3.6 \text{ nm}^{-1}$ . As a first approximation we can

618 ignore the COM and relative momenta inside the Coulomb potential  $V_{K^W-K^G+\mathbf{K}+\mathbf{k}-\mathbf{q}}^{Dex} \approx V_{K^W-K^G}^{Dex}$

619 and get a first estimate for the Dexter coupling

$$H_D = - \sum_{\mathbf{K}, \mathbf{q}, \nu} D_{\mathbf{K}} P_{\mathbf{K}}^{\dagger \nu} R_{\mathbf{K}}^{K^G+\mathbf{q}} + h.c., \quad (50)$$

620 with

$$D_{\mathbf{K}} = \frac{1}{4\sqrt{A}} \chi^c \chi^v \varphi^{*\nu}(\mathbf{r} = \mathbf{0}) V_{K^W-K^G}^{Dex}. \quad (51)$$

621 Similar to the Förster transfer, we can evaluate the Dexter induced scattering rate for WSe<sub>2</sub>

622 excitons to graphene

$$\Gamma_{\mathbf{Q}} = 2\pi \sum_{\mathbf{q}} |D_{\mathbf{Q}}|^2 \delta(E_{\mathbf{Q}}^{\mathbf{q}} - E_{\mathbf{Q}}^{1s}) \quad (52)$$

623 with yields

$$\Gamma_{\mathbf{Q}} = \frac{|D_{\mathbf{Q}}|^2 A E_{\mathbf{Q}}}{4\hbar^2 v_F^2}. \quad (53)$$

624 Supplementary Fig. 14a illustrates the Dexter transfer rate from WSe<sub>2</sub> to graphene as a

625 function of the wave function overlap for the same structure as considered for the Förster transfer.

626 Assuming an overlap between the TMD and graphene wave functions of  $\chi = 0.039$  (see estimation

627 below, Supplementary Fig. 15a), we arrive at a Dexter rate of  $1.0 \cdot 10^{-6}$  meV. This number is small

628 due to the mismatch of the  $K$  points of WSe<sub>2</sub> and graphene and due to the small overlap of the

629 wave functions which enters with the fourth power. As long as the COM momentum  $\mathbf{Q}$  is much

630 smaller compared to the distance between the  $K$  points, the Dexter rate is independent of the COM

631 momentum.

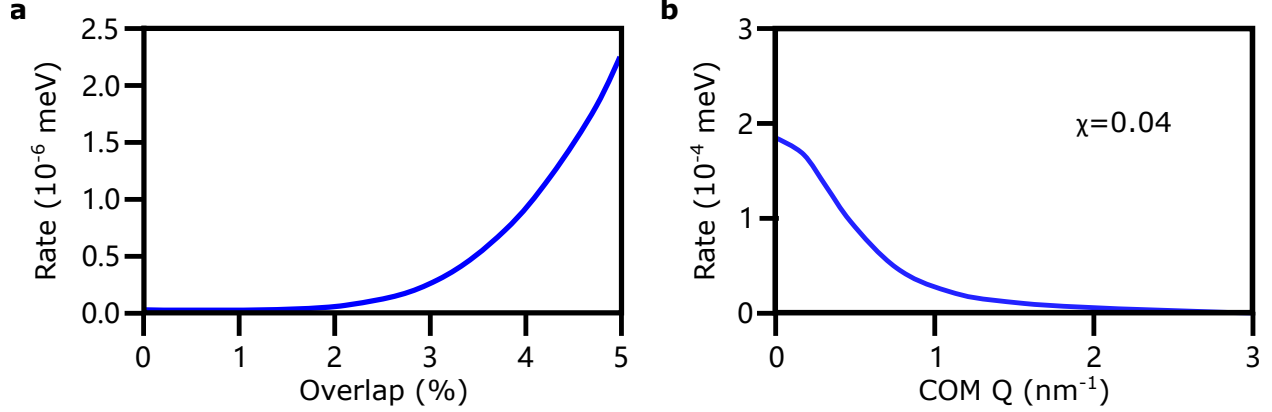

632

633 **Supplementary Fig. 14: Estimation for the Dexter transfer rate.** **a**, Dexter transfer  
 634 rate from  $WSe_2$  to graphene as a function of the overlap of the electronic wave functions  
 635 of graphene and  $WSe_2$ . **b**, Dexter transfer rate from  $WSe_2$  to graphene as a function of  
 636 the excitonic COM momentum  $Q$ , with the  $K_{WSe_2}$  valley and graphene being shifted on top  
 637 of each others.

638 **Maximum estimation for the Dexter process** The reason for the very weak Dexter process is  
 639 the large momentum mismatch between the  $K$  points in  $WSe_2$  and graphene. This generates a  
 640 momentum-bottleneck. To get an estimation of the maximally possible Dexter rate (and Dexter-  
 641 like processes, such as Dexter-two-phonon processes), we remove this bottleneck artificially and  
 642 move the  $K$  points of both layers on top of each other. The Hamiltonian reads

$$H_D = - \sum_{\mathbf{K}, \mathbf{q}, \nu} D_{\mathbf{q}, \mathbf{K}} P_{\mathbf{K}}^{\dagger \lambda} R_{\mathbf{K}}^{\mathbf{q}} + h.c.. \quad (54)$$

643 with the coupling element

$$D_{\mathbf{q}, \mathbf{K}} = \frac{1}{4\sqrt{A}} \chi^c \chi^v \sum_{\mathbf{k}} \varphi_{\mathbf{k}}^{* \nu} V_{\mathbf{K}+\mathbf{k}-\mathbf{q}}^{Dex}. \quad (55)$$

644 The relaxation rate of excitons to graphene is then given by

$$\Gamma_{\mathbf{K}} = \frac{A}{2\pi\hbar} \int_0^{2\pi} d\phi \frac{E_{\mathbf{K}}}{\hbar^2 v_F^2} \left| D_{\frac{E_{\mathbf{K}}}{\hbar v_F} (\cos\phi, \sin\phi)^T, \mathbf{K}} \right|^2. \quad (56)$$

645 Supplementary Fig. 14b illustrates the maximum estimation of the Dexter rate as the function  
646 of the COM momentum. We find a relatively weak rate in the order of  $10^{-3}$  meV due to the poor  
647 wave function overlap. If we would set  $\chi = 1$ , we would obtain 70 meV at the maximum. Last,  
648 we calculate the thermal average of the Dexter rate, i.e. integrate the momentum dependent Dexter  
649 rate together with a normalized Boltzmann distribution at 300 K. We obtain  $1.5 \cdot 10^{-4}$  meV.

650 We would like to note the computation of orbital overlaps is very difficult. Practically, we  
651 do not calculate the overlap explicitly but compute the Dexter rate as function of wavefunction  
652 overlap. Note, the overlap is not a "totally" unknown parameter in our sample, since we can use  
653 the trARPES result as an input. With the below-bandgap excitation (outside the range of the MA  
654 transition and therefore constituting as an independent result), we observe an interlayer electron  
655 scattering from graphene to WSe<sub>2</sub>. By comparing with our calculation of the phonon-assisted  
656 charge tunneling rate as function of wavefunction overlap, we could extract an overlap value of  
657 around 4%. It can be used to calculate the Dexter-type energy transfer rate in a reasonable range.  
658 This wavefunction overlap value is comparable to the *ab-initio* calculated value of the neighbored  
659 atoms overlap in graphene, 7%<sup>35</sup>, and the interlayer overlap in a MoSe<sub>2</sub>/WSe<sub>2</sub> heterostructure,  
660 1%<sup>29</sup>.

Besides the wavefunction overlap, we present the details of the Dexter transfer calculation



and the applied approximations in the following. We start from the general Coulomb Hamiltonian involving all transfer processes (Förster, Dexter, Meiner-Auger)

$$H = \sum_{\substack{\lambda_1, \lambda_2, \lambda_3, \lambda_4 \\ \mathbf{k}_1, \mathbf{k}_2, \mathbf{k}_3, \mathbf{k}_4 \\ l_1, l_2, l_3, l_4}} V_{\mathbf{k}_1, \mathbf{k}_2, \mathbf{k}_3, \mathbf{k}_4}^{\lambda_1 \nu_2 \lambda_3 \lambda_4 l_1 l_2 l_3 l_4} \lambda_{1, \mathbf{k}_1}^{\dagger l_1} \lambda_{2, \mathbf{k}_2}^{\dagger l_2} \lambda_{3, \mathbf{k}_3}^{l_3} \lambda_{4, \mathbf{k}_4}^{l_4} \quad (57)$$

$$V_{\mathbf{k}_1, \mathbf{k}_2, \mathbf{k}_3, \mathbf{k}_4}^{\lambda_1 \nu_2 \lambda_3 \lambda_4 l_1 l_2 l_3 l_4} = \int d^3 r \int d^3 r' \Psi_{\lambda_1, \mathbf{k}_1}^{* l_1}(\mathbf{r}) \Psi_{\lambda_2, \mathbf{k}_2}^{* l_2}(\mathbf{r}') V(\mathbf{r} - \mathbf{r}') \Psi_{\lambda_3, \mathbf{k}_3}^{l_3}(\mathbf{r}') \Psi_{\lambda_4, \mathbf{k}_4}^{l_4}(\mathbf{r}) \quad (58)$$

with band  $\lambda_i$ , wave vector  $\mathbf{k}_i$  and layer  $l_i$ . In Eq. (57) we can perform the sum over the band and layer indices. The combination  $l_1 = l_3$  and  $l_2 = l_4$  and  $\lambda_1 = \lambda_4 = c$  and  $\lambda_2 = \lambda_3 = v$  corresponds to the Dexter Hamiltonian:

$$H = \sum_{\mathbf{k}_1, \mathbf{k}_2, \mathbf{k}_3, \mathbf{k}_4} V_{\mathbf{k}_1, \mathbf{k}_2, \mathbf{k}_3, \mathbf{k}_4}^{cvvcGWGW} c_{\mathbf{k}_1}^{\dagger G} v_{\mathbf{k}_2}^{\dagger W} v_{\mathbf{k}_3}^G c_{\mathbf{k}_4}^W + \text{H.c.} = \sum_{\mathbf{k}, \mathbf{q}, \mathbf{k}', \mathbf{q}'} V_{\mathbf{k}, \mathbf{q}, \mathbf{k}', \mathbf{q}'}^{cvvc} c_{\mathbf{k}}^{\dagger} v_{\mathbf{q}}^{\dagger} v_{\mathbf{k}'} c_{\mathbf{q}'} + \text{H.c.} \quad (59)$$

where in the second step, we define  $\mathbf{k}^{(l)}$  as wave vectors in graphene and  $\mathbf{q}^{(l)}$  as wave vectors in WSe<sub>2</sub>, such that we can drop the layer index for graphene (*G*) and WSe<sub>2</sub> (*W*). The Hamiltonian Eq. (59) describes the electron transfer from the conduction band of WSe<sub>2</sub> to graphene, together with the valence electron transfer from graphene to WSe<sub>2</sub>. The matrix element reads

$$V_{\mathbf{k}, \mathbf{q}, \mathbf{k}', \mathbf{q}'}^{cvvc} = \frac{1}{A} \sum_{\mathbf{K}} \int d^3 r \int d^3 r' \Psi_{c, \mathbf{k}}^*(\mathbf{r}) \Psi_{v, \mathbf{q}}^*(\mathbf{r}') V_{\mathbf{K}}(z, z') \Psi_{v, \mathbf{q}'}(\mathbf{r}') \Psi_{c, \mathbf{k}'}(\mathbf{r}), \quad (60)$$

661 where we denote the in-plane Fourier transformed Coulomb potential by  $V_{\mathbf{K}}(z, z')$ .

662

Now, we calculate the Dexter transfer rate. First, we set the interlayer distance to zero. This yields an upper limit of the Dexter rate in the heterostructure using the proper Coulomb potential. From Eq. (60) we perform the standard steps of shifting the integrals into the first unit

cell  $\mathbf{r}_{\parallel}^{(l)} \rightarrow \mathbf{r}_{\parallel,n}^{(l)} + \mathbf{R}_n^{(l)}$  and summing over all unit cells  $\sum_{n,n'}$ . After inserting Bloch functions we obtain

$$V_{\mathbf{k},\mathbf{q},\mathbf{k}',\mathbf{q}'}^{cvcv} = \frac{1}{A} \sum_{\mathbf{K}} \int_{UC} dz \int_{UC} dz' \chi^c(z) \chi^v(z') V_{\mathbf{K}}(z, z') \delta_{\mathbf{k},\mathbf{q}'+\mathbf{K}} \delta_{\mathbf{q},\mathbf{k}'-\mathbf{K}}, \quad (61)$$

where the Kronecker delta is obtained from the Bloch wave envelopes. In Eq. (61) we define the orbital overlap  $\chi^\lambda(z) = \frac{1}{\sqrt{v_{uc}}} \int_{UC} d^2 r_{\parallel} u_W^{*\lambda}(\mathbf{r}_{\parallel}, z) u_G^\lambda(\mathbf{r}_{\parallel}, z)$  of WSe<sub>2</sub> ( $W$ ) and graphene ( $G$ ) wavefunction. The  $z^{(l)}$ -integration runs over the two materials, such that Eq. (61) can also be written as

$$V_{\mathbf{k},\mathbf{q},\mathbf{k}',\mathbf{q}'}^{cvcv} = \frac{1}{A} \sum_{\mathbf{K}} \delta_{\mathbf{k},\mathbf{q}'+\mathbf{K}} \delta_{\mathbf{q},\mathbf{k}'-\mathbf{K}} \left( \int_W dz \int_W dz' \chi^c(z) \chi^v(z') V_{\mathbf{K}}(z, z') + \int_W dz \int_G dz' \chi^c(z) \chi^v(z') V_{\mathbf{K}}(z, z') \right. \\ \left. + \int_G dz \int_W dz' \chi^c(z) \chi^v(z') V_{\mathbf{K}}(z, z') + \int_G dz \int_G dz' \chi^c(z) \chi^v(z') V_{\mathbf{K}}(z, z') \right). \quad (62)$$

To treat the  $z$ -integrations in Eq. (62), we assume that the Coulomb potential varies only weakly in the out-of-plane direction (due to the atomic thickness of the two materials). The approach presented here is also performed for the Rytova-Keldysh potential in 2D materials<sup>36-38</sup> and serves as a standard assumption<sup>39-41</sup>. Then, we can use the Coulomb potential directly at the material position and take it out of the integral. We obtain Eq. (62)

$$V_{\mathbf{k},\mathbf{q},\mathbf{k}',\mathbf{q}'}^{cvcv} = \frac{1}{A} \sum_{\mathbf{K}} \delta_{\mathbf{k},\mathbf{q}'+\mathbf{K}} \delta_{\mathbf{q},\mathbf{k}'-\mathbf{K}} (\chi_W^c \chi_W^v V_{\mathbf{K}}(z = z_W, z' = z_W) \\ + \chi_W^c \chi_G^v V_{\mathbf{K}}(z = z_W, z' = z_G) + \chi_G^c \chi_W^v V_{\mathbf{K}}(z = z_G, z' = z_W) + \chi_G^c \chi_G^v V_{\mathbf{K}}(z = z_G, z' = z_G)) \quad (63)$$

with  $\chi_{W/G}^\lambda = \int_{W/G} dz \chi^\lambda(z)$  describing the wavefunction overlap of the bands  $\lambda$  of the individual layers (since  $\chi^\lambda = \int_{UC} d^2 r_{\parallel} u_W^{*\lambda}(\mathbf{r}_{\parallel}, z) u_G^\lambda(\mathbf{r}_{\parallel}, z)$ ). Next, we assume that both layers contribute

equally to the wavefunction overlap. This has the consequence that the interlayer and intralayer Coulomb potential contribute equally to the Dexter rate. In an extreme scenario, we calculate the Dexter-type transfer rate with the wavefunction overlap occurring only in one material. It means two times of the intralayer potential will appear instead of the interlayer potential. The Dexter-type transfer rate only increases by a factor of  $\sim 1.5$ , indicating that the transfer process depends mainly on the wavefunction overlap value (which enters to the power of 4 in the Dexter rate) but not where the overlap occurs. By using  $\chi_W^\lambda = \chi_G^\lambda = \frac{1}{2}\chi^\lambda$  we obtain the final expression

$$V_{\mathbf{k},\mathbf{q},\mathbf{k}',\mathbf{q}'}^{cvc} = \frac{1}{4A}\chi^c\chi^v \sum_{\mathbf{K}} \delta_{\mathbf{k},\mathbf{q}'+\mathbf{K}}\delta_{\mathbf{q},\mathbf{k}'-\mathbf{K}} V_{\mathbf{K}}^{Dex} \quad (64)$$

$$V_{\mathbf{K}}^{Dex} = V_{\mathbf{K}}(z = z_W, z' = z_W) + V_{\mathbf{K}}(z = z_W, z' = z_G) + V_{\mathbf{K}}(z = z_G, z' = z_W) + V_{\mathbf{K}}(z = z_G, z' = z_G) . \quad (65)$$

When we reinsert the matrix element into the Hamiltonian Eq. (59) and shift the origin of the wave vector on the  $\mathbf{K}$  points of the respective materials, i.e.  $\mathbf{k} \rightarrow \mathbf{K}^W + \mathbf{k}$  and  $\mathbf{q} \rightarrow \mathbf{K}^G + \mathbf{q}$  we obtain

$$H_D = \sum_{\mathbf{K},\mathbf{k},\mathbf{q}} \frac{1}{4A}\chi^c\chi^v V_{\mathbf{K}^W-\mathbf{K}^G+\mathbf{K}+\mathbf{k}-\mathbf{q}}^{Dex} c_{\mathbf{K}^W+\mathbf{k}+\mathbf{K}}^{\dagger W} v_{\mathbf{K}^G+\mathbf{q}-\mathbf{K}}^{\dagger G} v_{\mathbf{K}^W+\mathbf{k}}^W c_{\mathbf{K}^G+\mathbf{q}}^G + \text{H.c.} \quad (66)$$

663 Finally, we find that the Fourier transformed Coulomb potential  $V_{\mathbf{K}^W-\mathbf{K}^G+\mathbf{K}+\mathbf{k}-\mathbf{q}}^{Dex}$  depends on the  
664 momentum difference  $\mathbf{K}_W - \mathbf{K}_G + \mathbf{K} + \mathbf{k} - \mathbf{q}$ , where  $\mathbf{K}_W$  and  $\mathbf{K}_G$  are the  $\mathbf{K}$  points of WSe<sub>2</sub> and  
665 graphene respectively,  $\mathbf{k}$  and  $\mathbf{q}$  are the electronic momenta in WSe<sub>2</sub> and graphene, respectively  
666 and  $\mathbf{K}$  is the Coulomb induced momentum transfer. From  $V_{\mathbf{K}^W-\mathbf{K}^G+\mathbf{K}+\mathbf{k}-\mathbf{q}}^{Dex}$  we see that if a large  
667 momentum mismatch between the valleys occurs, the Dexter contribution is reduced. To obtain an  
668 upper limit estimate, we approximate  $\mathbf{K}_W - \mathbf{K}_G + \mathbf{K} + \mathbf{k} - \mathbf{q} \approx \mathbf{K}_W - \mathbf{K}_G$ , to be the dominant  
669 distance.

670 The computation of the Dexter rate is based on the above approximations and the trARPES result  
 671 of ICT.

### 672 Microscopic calculation of interlayer phonon-assisted tunneling process

In this section we will derive an expression for the phonon-assisted tunneling of carriers between the layers. The Hamiltonian of phonon scattering and tunneling can be generally written as

$$H = H_0 + H_1, \quad (67)$$

with  $H_0$  accounting for the dispersion of electrons and phonons.

$$H_0 = \sum_a \epsilon^a a_a^\dagger a_a + \sum_b \hbar\omega^b b_b^\dagger b_b. \quad (68)$$

673 The first term accounts for the dispersion of carriers with operators  $a_a^{(\dagger)}$  and the second term  
 674 accounts for the dispersion of phonons with operators  $b_b^{(\dagger)}$ . The quantum numbers  $a, b$  account for  
 675 layer and momentum of the carriers. The interaction Hamiltonian  $H_1$  reads

$$H_1 = \sum_{ab} t^{ab} a_a^\dagger a_b + \sum_{abc} g^{abc} a_a^\dagger a_b (b_c + b_{-c}^\dagger), \quad (69)$$

676 where the first term represents the tunneling and the second term the scattering of carriers with  
 677 phonons. Here the notation  $-c$  implies, that the momentum has to be inverted, but all other  
 678 quantum numbers stay the same.

679 While we are interested in the second order processes of phonon-assisted tunneling, we apply

680 a canonical transformation to the Hamiltonian

$$H' = e^{-S} H e^S = H_0 + \underbrace{(H_1 + [H_0, S])}_{\text{first order}} + \underbrace{\frac{1}{2}[H_1, S]}_{\text{second order}}, \quad (70)$$

681 and claim that the first order in the interaction vanishes. This holds true for the choice

$$S = \sum_{ab} \alpha_{ab} t^{ab} a^\dagger a_b + \sum_{abc} g^{abc} a_a^\dagger a_b (\beta_{abc} b_c + \gamma_{abc} b_{-c}^\dagger), \quad (71)$$

with coefficients

$$\alpha_{ab} = \frac{1}{\epsilon^b - \epsilon^a}, \quad (72)$$

$$\beta_{abc} = \frac{1}{\epsilon^b - \epsilon^a + \hbar\omega^c}, \quad (73)$$

$$\gamma_{abc} = \frac{1}{\epsilon^b - \epsilon^a - \hbar\omega^c}. \quad (74)$$

682 The second order Hamiltonian is now given as

$$H_2 = \frac{1}{2}[H_1, S]. \quad (75)$$

683 Restricting ourselves only to the tunneling-phonon contribution (besides this, also higher order

684 tunneling terms, two-phonon processes as well as attractive electron-electron interaction through

685 phonon interaction are contained in this Hamiltonian) we obtain

$$H = \frac{1}{2} \sum_{abcd} t^{db} g^{adc} a_a^\dagger a_b \left( \left( \frac{1}{\epsilon^b - \epsilon^d} - \frac{1}{\epsilon^d - \epsilon^a + \hbar\omega^c} \right) b_c + \left( \frac{1}{\epsilon^b - \epsilon^d} - \frac{1}{\epsilon^d - \epsilon^a - \hbar\omega^{-c}} \right) b_{-c}^\dagger \right) \\ - \frac{1}{2} \sum_{abcd} t^{ad} g^{dbc} a_a^\dagger a_b \left( \left( \frac{1}{\epsilon^d - \epsilon^a} - \frac{1}{\epsilon^b - \epsilon^d + \hbar\omega^c} \right) b_c + \left( \frac{1}{\epsilon^d - \epsilon^a} - \frac{1}{\epsilon^b - \epsilon^d - \hbar\omega^{-c}} \right) b_{-c}^\dagger \right) \quad (76)$$

686 Now we insert the compounds:  $a = (\mathbf{k}_a, \lambda_a, l_a)$  for electrons, where  $\mathbf{k}_a$  accounts for the  
687 momentum,  $\lambda_a$  accounts for the band and  $l_a$  accounts for the layer quantum number. For phonons  
688 we insert the compounds  $c = (\mathbf{k}_c, l_c, \xi_c)$ , with momentum  $\mathbf{k}_c$ , layer  $l_c$  and branch  $\xi_c$  and apply the  
689 selection rules from the matrix elements:

$$t_{\mathbf{k}_b \mathbf{k}_d}^{\lambda_b \lambda_d l_b l_d} = t^{\lambda_b \lambda_d l_b l_d} \delta_{\mathbf{k}_b \mathbf{k}_d}^{\lambda_b l_d} \delta^{\lambda_b \lambda_d}, \quad (77)$$

690 i.e. the tunneling conserves momentum, and band but changes the layer index, and

$$g_{\mathbf{k}_a \mathbf{k}_d \mathbf{k}_c}^{\lambda_a \lambda_d l_a l_d l_c} = g_{\mathbf{k}_c}^{\lambda_a \lambda_d l_a l_d l_c} \delta_{l_a l_d}^{\lambda_a l_d} \delta_{\mathbf{k}_c, \mathbf{k}_a - \mathbf{k}_d}^{\lambda_a l_c} \delta^{\lambda_a \lambda_d}. \quad (78)$$

691 i.e. phonon scattering conserves the layer index, but changes the momentum of the carriers.

692 As a result we obtain

$$H = \frac{1}{2} \sum_{\mathbf{k} \mathbf{K} \lambda l \xi} \lambda_{\mathbf{k}+\mathbf{K}}^{\dagger l} \lambda_{\mathbf{k}}^l \left( \underbrace{t^{\lambda l} g_{\mathbf{K}}^{\lambda l \xi} (\alpha_{\mathbf{k}}^{\lambda l} + \gamma_{\mathbf{k}, \mathbf{K}}^{\lambda l \xi})}_{s_{\mathbf{k}, \mathbf{K}}^{\lambda l \xi}} b_{\mathbf{K}}^{l \xi} + \underbrace{t^{\lambda l} g_{\mathbf{K}}^{\lambda l \xi} (\alpha_{\mathbf{k}}^{\lambda l} + \beta_{\mathbf{k}, \mathbf{K}}^{\lambda l \xi})}_{\tilde{s}_{\mathbf{k}, \mathbf{K}}^{\lambda l \xi}} b_{-\mathbf{K}}^{\dagger l \xi} \right) \\ - \frac{1}{2} \sum_{\mathbf{k} \mathbf{K} \lambda l \xi} \lambda_{\mathbf{k}+\mathbf{K}}^{\dagger l} \lambda_{\mathbf{k}}^l \left( \underbrace{t^{\lambda l} g_{\mathbf{K}}^{\lambda l \xi} (\alpha_{\mathbf{k}+\mathbf{K}}^{\lambda l} + \gamma_{\mathbf{k}, \mathbf{K}}^{\lambda l \xi})}_{u_{\mathbf{k}, \mathbf{K}}^{\lambda l \xi}} b_{\mathbf{K}}^{l \xi} + \underbrace{t^{\lambda l} g_{\mathbf{K}}^{\lambda l \xi} (\alpha_{\mathbf{k}+\mathbf{K}}^{\lambda l} + \beta_{\mathbf{k}, \mathbf{K}}^{\lambda l \xi})}_{\tilde{u}_{\mathbf{k}, \mathbf{K}}^{\lambda l \xi}} b_{-\mathbf{K}}^{\dagger l \xi} \right), \quad (79)$$

with

$$\alpha_{\mathbf{k}}^{\lambda ij} = \frac{1}{\epsilon_{\mathbf{k}}^{\lambda i} - \epsilon_{\mathbf{k}}^{\lambda j}} \quad (80)$$

$$\beta_{\mathbf{k},\mathbf{K}}^{\lambda i\xi} = \frac{1}{\epsilon_{\mathbf{k}+\mathbf{K}}^{\lambda i} - \epsilon_{\mathbf{k}}^{\lambda i} + \hbar\omega_{-\mathbf{K}}^{i\xi}} \quad (81)$$

$$\gamma_{\mathbf{k},\mathbf{K}}^{\lambda i\xi} = \frac{1}{\epsilon_{\mathbf{k}+\mathbf{K}}^{\lambda i} - \epsilon_{\mathbf{k}}^{\lambda i} - \hbar\omega_{\mathbf{K}}^{i\xi}} \quad (82)$$

Both lines describe phonon assisted tunneling from  $\mathbf{k}, b$  to  $\mathbf{k} + \mathbf{K}, \bar{b}$ . However, in the first line first the tunneling and next the phonon scattering takes place, whereas in the second line, first the phonon scattering and next the tunneling takes place. Considering the intermediate states  $\mathbf{k}, \bar{b}$  and  $\mathbf{k} + \mathbf{K}, b$  being much larger in energy, in both lines, all contributions have the same sign and add up. The relative sign between both lines ( $-$ ) is compensated by the opposite signs of the appearing  $u$  and  $s$  functions. To further evaluate the phonon assisted tunnel Hamiltonian, we carry out the summation over the layer

$$\begin{aligned} H = & \frac{1}{2} \sum_{\mathbf{k}\mathbf{K}\lambda G\xi} \lambda_{\mathbf{k}+\mathbf{K}}^{\dagger W} \lambda_{\mathbf{k}}^G \left( \underbrace{t^{\lambda GW} g_{\mathbf{K}}^{\lambda W\xi} (\alpha_{\mathbf{k}}^{\lambda GW} + \gamma_{\mathbf{k},\mathbf{K}}^{\lambda W\xi})}_{s_{\mathbf{k},\mathbf{K}}^{\lambda GW\xi}} b_{\mathbf{K}}^{W\xi} + \underbrace{t^{\lambda GW} g_{\mathbf{K}}^{\lambda W\xi} (\alpha_{\mathbf{k}}^{\lambda GW} + \beta_{\mathbf{k},\mathbf{K}}^{\lambda W\xi})}_{\tilde{s}_{\mathbf{k},\mathbf{K}}^{\lambda GW\xi}} b_{-\mathbf{K}}^{\dagger W\xi} \right) \\ & - \frac{1}{2} \sum_{\mathbf{k}\mathbf{K}\lambda W\xi} \lambda_{\mathbf{k}+\mathbf{K}}^{\dagger G} \lambda_{\mathbf{k}}^W \left( \underbrace{t^{\lambda GW} g_{\mathbf{K}}^{\lambda W\xi} (\alpha_{\mathbf{k}+\mathbf{K}}^{\lambda WG} + \gamma_{\mathbf{k},\mathbf{K}}^{\lambda W\xi})}_{u_{\mathbf{k},\mathbf{K}}^{\lambda WG\xi}} b_{\mathbf{K}}^{W\xi} + \underbrace{t^{\lambda GW} g_{\mathbf{K}}^{\lambda W\xi} (\alpha_{\mathbf{k}+\mathbf{K}}^{\lambda WG} + \beta_{\mathbf{k},\mathbf{K}\xi}^{\lambda W})}_{\tilde{u}_{\mathbf{k},\mathbf{K}}^{\lambda WG\xi}} b_{-\mathbf{K}}^{\dagger W\xi} \right) \\ & + \frac{1}{2} \sum_{\mathbf{k}\mathbf{K}\lambda\xi} \lambda_{\mathbf{k}+\mathbf{K}}^{\dagger G} \lambda_{\mathbf{k}}^W \left( \underbrace{t^{\lambda WG} g_{\mathbf{K}}^{\lambda G\xi} (\alpha_{\mathbf{k}}^{\lambda WG} + \gamma_{\mathbf{k},\mathbf{K}}^{\lambda G\xi})}_{s_{\mathbf{k},\mathbf{K}}^{\lambda WG\xi}} b_{\mathbf{K}}^{G\xi} + \underbrace{t^{\lambda WG} g_{\mathbf{K}}^{\lambda G\xi} (\alpha_{\mathbf{k}}^{\lambda WG} + \beta_{\mathbf{k},\mathbf{K}}^{\lambda G\xi})}_{\tilde{s}_{\mathbf{k},\mathbf{K}}^{\lambda WG\xi}} b_{-\mathbf{K}}^{\dagger G\xi} \right) \\ & - \frac{1}{2} \sum_{\mathbf{k}\mathbf{K}\lambda\xi} \lambda_{\mathbf{k}+\mathbf{K}}^{\dagger W} \lambda_{\mathbf{k}}^G \left( \underbrace{t^{\lambda WG} g_{\mathbf{K}}^{\lambda G\xi} (\alpha_{\mathbf{k}+\mathbf{K}}^{\lambda GW} + \gamma_{\mathbf{k},\mathbf{K}}^{\lambda G\xi})}_{u_{\mathbf{k},\mathbf{K}}^{\lambda GW\xi}} b_{\mathbf{K}}^{G\xi} + \underbrace{t^{\lambda WG} g_{\mathbf{K}}^{\lambda G\xi} (\alpha_{\mathbf{k}+\mathbf{K}}^{\lambda GW} + \beta_{\mathbf{k},\mathbf{K}}^{\lambda G\xi})}_{\tilde{u}_{\mathbf{k},\mathbf{K}}^{\lambda GW\xi}} b_{-\mathbf{K}}^{\dagger G\xi} \right) \quad (83) \end{aligned}$$

Here, the first two lines involve phonons in  $\text{WSe}_2$  whereas the last two lines involve phonons

in graphene. The  $-$  signs in front of line two and line four are compensated by the opposite signs of the  $s$  and  $u$  functions. To investigate the different contributions to the tunnel-phonon coupling in more detail, we evaluate the functions  $s$  and  $u$  in the different terms: (a) we fix the momenta in WSe<sub>2</sub> to the vicinity of the  $K$  point. (b) While all scattering processes conserve the energy, the approximation (a) settles the energy and momentum range of involved carriers. (c) In the next step, we approximate the prefactors  $\alpha_{\mathbf{k}}^{\lambda ij}$  by their values in the region of interest, where we find  $\alpha_{\mathbf{k} \approx K_W}^{cGW} = \frac{1}{1\text{eV}}$  and  $\alpha_{\mathbf{k} \approx K_G}^{cWG} = \frac{1}{250\text{meV}}$ , which are read out from the DFT calculation in the main manuscript. To evaluate the prefactors  $\beta_{\mathbf{k},\mathbf{K}}^{\lambda i\xi}$  and  $\gamma_{\mathbf{k},\mathbf{K}}^{\lambda i\xi}$  we first realize, that that  $\Delta E_{K_G}$  appears whenever WSe<sub>2</sub> phonons are involved, and  $\Delta E_{K_W}$  appears whenever graphene phonons are involved.  $\Delta E_{K_G} \approx 250\text{meV}$  is large in comparison to typical phonon energies of 30 meV in WSe<sub>2</sub> and  $\Delta E_{K_W} \approx 1\text{eV}$  is large in comparison to typical phonon energies of 200 meV in graphene. Consequently we ignore the appearing phonon energies in  $\beta_{\mathbf{k},\mathbf{K}}^{\lambda i\xi}$  and  $\gamma_{\mathbf{k},\mathbf{K}}^{\lambda i\xi}$ . As a result, the Hamiltonian simplifies to

$$\begin{aligned}
H = & \sum_{\mathbf{k}\mathbf{K}\lambda,\xi} \underbrace{\frac{t^{\lambda GW} g_{\mathbf{K}}^{\lambda W\xi}}{\epsilon_{K_{gr}}^W - \epsilon_{K_{gr}}^G}}_{h_{\mathbf{K}}^{W\xi} \approx \text{const.}} \lambda_{\mathbf{k}+\mathbf{K}}^{\dagger W} \lambda_{\mathbf{k}}^G \left( b_{\mathbf{K}}^{W\xi} + b_{-\mathbf{K}}^{\dagger W\xi} \right) + h.c. \\
& + \sum_{\mathbf{k}\mathbf{K}\lambda\xi} \underbrace{\frac{t^{\lambda WG} g_{\mathbf{K}}^{\lambda G\xi}}{\epsilon_{K_W}^G - \epsilon_{K_W}^W}}_{h_{\mathbf{K}}^G \approx \text{const.}} \lambda_{\mathbf{k}+\mathbf{K}}^{\dagger W} \lambda_{\mathbf{k}}^G \left( b_{\mathbf{K}}^{G\xi} + b_{-\mathbf{K}}^{\dagger G\xi} \right) + h.c. .
\end{aligned} \tag{84}$$

For a carrier in graphene, the relaxation rate to WSe<sub>2</sub> via phonon-assisted tunneling is given



as

$$\Gamma_{\mathbf{k}}^G = 2\pi \sum_{\pm, \mathbf{K}, \xi, i \in \{W, G\}} |h_{\mathbf{K}}^{i\xi}|^2 \left( \frac{1}{2} \pm \frac{1}{2} + n_{\mathbf{K}}^{i\xi} \right) \delta(\epsilon_{\mathbf{k}}^G - \epsilon_{\mathbf{k}+\mathbf{K}}^W \mp \hbar\omega_{\mathbf{K}}^{i\xi}) \quad (85)$$

693 Assuming  $h_{\mathbf{K}}^{i\xi} \approx h^{i\xi}$  and  $\hbar\omega_{\mathbf{K}}^{i\xi} \approx \hbar\omega^{i\xi}$ , we obtain

$$\Gamma_{\mathbf{k}}^G = A \sum_{i \in \{W, G\}, \xi, \pm} \frac{m^W}{\hbar^2} |h^i|^2 \left( \frac{1}{2} \pm \frac{1}{2} + n^{i\xi} \right) 1_{\epsilon_{\mathbf{k}}^G \mp \hbar\omega^{i\xi} - \epsilon_0^W > 0}, \quad (86)$$

694 which is constant for graphene electrons which have at least the energy of the conduction band  
 695 plus the phonon energy in graphene. This reflects the constant density of states in WSe<sub>2</sub>. The area  
 696  $A$  cancels with the area in the phonon coupling element which is contained in  $h^i$ .

In contrast for carriers initially located in WSe<sub>2</sub>, we get

$$\Gamma_{\mathbf{k}}^W = 2\pi \sum_{\pm, \mathbf{K}, \xi, i \in \{W, G\}} |h_{\mathbf{K}}^{i\xi}|^2 \left( \frac{1}{2} \pm \frac{1}{2} + n_{\mathbf{K}}^{i\xi} \right) \delta(\epsilon_{\mathbf{k}}^W - \epsilon_{\mathbf{k}+\mathbf{K}}^G \mp \hbar\omega_{\mathbf{K}}^{i\xi}). \quad (87)$$

697 With similar approximation as above, we end up at

$$\Gamma_{\mathbf{k}}^W = A \sum_{i \in \{W, G\}, \xi, \pm} \frac{\epsilon_{\mathbf{k}} \mp \hbar\omega^{i\xi}}{\hbar^2 v_F^2} |h^i|^2 \left( \frac{1}{2} \pm \frac{1}{2} + n^{i\xi} \right), \quad (88)$$

698 To calculate the relaxation rates, we assume a potential barrier of  $E_B = 5$  eV corresponding  
 699 to the energy of the WSe<sub>2</sub> conduction band w.r.t. to the vacuum level. Then we approximate  
 700 the tunneling element as  $t = \chi E_B$ , with  $\chi$  being the wavefunction overlap<sup>29</sup>. For graphene, we  
 701 include two optical phonon branches with energies of  $\hbar\omega = 200$  meV and the coupling strength of  
 702  $g = 200$  meV<sup>42</sup>. For WSe<sub>2</sub>, we include two optical phonon branches with energies of  $\hbar\omega = 30$  meV

703 and the coupling strength of  $g = 10 \text{ meV}^{43}$ . Supplementary Fig. 15a illustrates the approximate  
 704 relaxation rates of electrons from graphene to  $\text{WSe}_2$  ( $\Gamma^G$ ) and  $\text{WSe}_2$  to graphene ( $\Gamma^W$ ) as a function  
 705 of the overlap of the wavefunctions between  $\text{WSe}_2$  and graphene. We find for both a quadratic  
 706 increase as a function of the overlap, since the latter enters quadratic in both relaxation rates. The  
 707 difference between both relaxation rates arise from different final densities of states of the carrier  
 708 relaxation. In the experiment, a delayed rise of the  $\text{WSe}_2$  signal w.r.t. to the graphene signal of  
 709 about 50 fs (13 meV) was found, which indicates an overlap of 4.0%. The order of magnitude of  
 710 this value appears reasonable, since the overlap between two neighboring graphene atoms is 7% as  
 711 an example<sup>35</sup>.

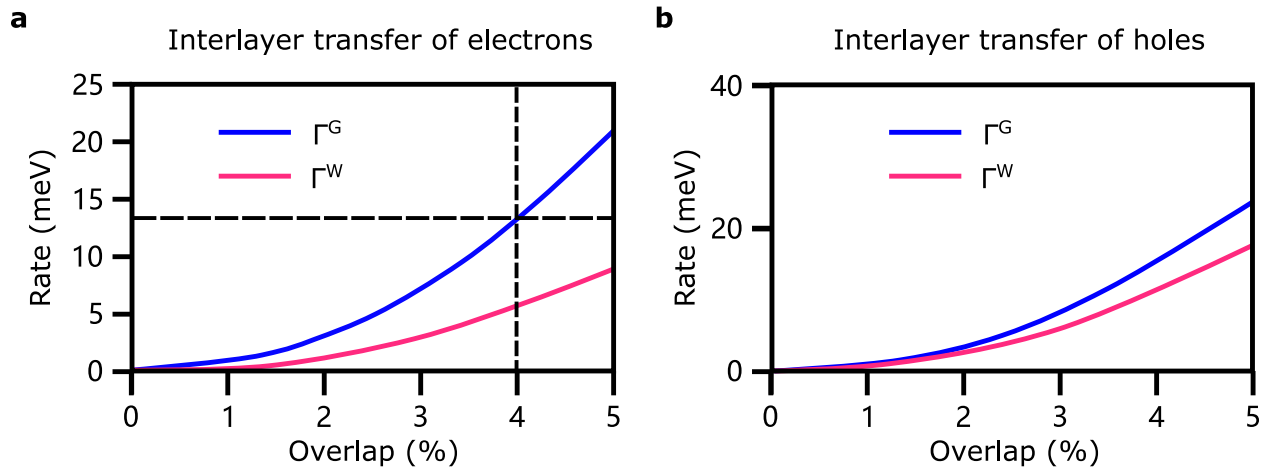

712  
 713 **Supplementary Fig. 15: Tunnel transfer for electrons and holes. a,** The ICT-induced  
 714 relaxation rate of electrons in graphene towards  $\text{WSe}_2$  (blue) as a function of the electronic  
 715 wavefunction overlap between the involved conduction bands. The relaxation rate of  
 716 electrons in  $\text{WSe}_2$  towards graphene (pink). The dashed lines indicate the overlapping  
 717 values which can be expected from the experiment results. **b,** The relaxation rate of

718 holes in graphene, which have larger energies compared to the valence band maximum  
719 in WSe<sub>2</sub> (blue) and the relaxation rate of holes in WSe<sub>2</sub> (pink).

720 To evaluate the phonon-assisted tunneling rates for holes, we assume similar phonon coupling  
721 elements in conduction and valence band in WSe<sub>2</sub><sup>43</sup> and graphene but account for the different  
722 dispersion of the valence band<sup>44</sup>. Supplementary Fig. 15b illustrates the tunneling rates of holes.  
723 We find qualitatively similar tunneling rates as for electrons. However, the tunneling of holes from  
724 WSe<sub>2</sub> to graphene is stronger compared to the electrons. This arises from the larger density of  
725 states of graphene for the involved final states. The reason for this, is that the Fermi energy of the  
726 system is closer to the conduction band minimum compared to the valence band maximum, cp.  
727 Fig. 2a in the manuscript.

Table 1: Parameters used in the computation. \* exemplary value at  $z = 0$  determined numerically by evaluating the Wannier equation for  $WSe_2$  on a SiC substrate.<sup>27,45</sup> \*\* taken as double distance between the chalcogen atoms. The Fermi velocity taken the experimental result.

| Param.           |                                                                 | Param.                              |                                        | Ref.  |
|------------------|-----------------------------------------------------------------|-------------------------------------|----------------------------------------|-------|
| $\hbar$          | 0.658 eV fs                                                     | $d_G$                               | 0.25 e nm                              | 46    |
| $e$              | 1 e                                                             | $v_F$                               | 1.8 nm fs <sup>-1</sup>                | exp   |
| $\epsilon_0$     | $5.5 \cdot 10^{-2} \text{ e}^2 \text{ eV}^{-1} \text{ nm}^{-1}$ | $d_{WSe_2}$                         | 0.32 e nm                              | 27    |
| $k_B$            | $8.6 \cdot 10^{-5} \text{ eV K}^{-1}$                           | $ \varphi_{WSe_2}(\mathbf{r} = 0) $ | 0.36 nm <sup>-1</sup>                  | *     |
| $\epsilon_{SiC}$ | 9.6                                                             | $E_{WSe_2}^{1s}$                    | 1.7 eV                                 | 47    |
|                  |                                                                 | $M_{WSe_2}$                         | 3.7 eVfs <sup>2</sup> nm <sup>-2</sup> | 20    |
| $\epsilon_G$     | 6 <sup>48</sup>                                                 | $\epsilon_{WSe_2}$                  | 13.36                                  |       |
| $a_G$            | 0.33 nm <sup>49</sup>                                           | $a_{WSe_2}$                         | 0.67 nm                                | ** 50 |

728 **References**

- 729 1. Zhao, W. *et al.* Lattice dynamics in mono-and few-layer sheets of WS<sub>2</sub> and WSe<sub>2</sub>. *Nanoscale*  
731 **5**, 9677–9683 (2013).
- 732 2. Terrones, H. *et al.* New first order Raman-active modes in few layered transition metal  
733 dichalcogenides. *Sci. Rep.* **4**, 4215 (2014).
- 734 3. Tonndorf, P. *et al.* Photoluminescence emission and Raman response of monolayer MoS<sub>2</sub>,  
735 MoSe<sub>2</sub>, and WSe<sub>2</sub>. *Opt. Express* **21**, 4908–4916 (2013).
- 736 4. He, K. *et al.* Tightly bound excitons in monolayer WSe<sub>2</sub>. *Phys. Rev. Lett.* **113**, 026803 (2014).
- 737 5. Froehlicher, G., Lorchat, E. & Berciaud, S. Charge versus energy transfer in atomically thin  
738 graphene-transition metal dichalcogenide van der Waals heterostructures. *Phys. Rev. X* **8**,  
739 011007 (2018).
- 740 6. Nakamura, H. *et al.* Spin splitting and strain in epitaxial monolayer WSe<sub>2</sub> on graphene. *Phys.*  
741 *Rev. B* **101**, 165103 (2020).
- 742 7. Maklar, J. *et al.* A quantitative comparison of time-of-flight momentum microscopes and  
743 hemispherical analyzers for time-resolved ARPES experiments *Rev. Sci. Instrum.* **91**, 123112  
744 (2020).
- 745 8. Gierz, I., Henk, J., Höchst, H., Ast, C. R. & Kern, K. Illuminating the dark corridor  
746 in graphene: Polarization dependence of angle-resolved photoemission spectroscopy on  
747 graphene. *Phys. Rev. B* **83**, 121408 (2011).

- 748 9. Hwang, C. *et al.* Fermi velocity engineering in graphene by substrate modification. *Sci. Rep.*  
749 **2**, 590 (2012).
- 750 10. Siegel, D. A. *et al.* Many-body interactions in quasi-freestanding graphene. *PNAS* **108**, 11365–  
751 11369 (2011).
- 752 11. Yuan, L., Wang, T., Zhu, T., Zhou, M. & Huang, L. Exciton dynamics, transport, and  
753 annihilation in atomically thin two-dimensional semiconductors. *J. Phys. Chem. Lett.* **8**, 3371–  
754 3379 (2017).
- 755 12. Wang, H., Zhang, C. & Rana, F. Ultrafast dynamics of defect-assisted electron–hole  
756 recombination in monolayer MoS<sub>2</sub>. *Nano Lett.* **15**, 339–345 (2015).
- 757 13. Dendzik, M. *et al.* Observation of an excitonic Mott transition through ultrafast core-*cum*-  
758 conduction photoemission spectroscopy. *Phys. Rev. Lett.* **125**, 096401 (2020).
- 759 14. Liu, F., Ziffer, M. E., Hansen, K. R., Wang, J. & Zhu, X. Direct determination of band-gap  
760 renormalization in the photoexcited monolayer MoS<sub>2</sub>. *Phys. Rev. Lett.* **122**, 246803 (2019).
- 761 15. Ruppert, C., Chernikov, A., Hill, H. M., Rigosi, A. F. & Heinz, T. F. The role of electronic and  
762 phononic excitation in the optical response of monolayer WS<sub>2</sub> after ultrafast excitation. *Nano*  
763 *Lett.* **17**, 644–651 (2017).
- 764 16. Tomadin, A., Brida, D., Cerullo, G., Ferrari, A. C. & Polini, M. Nonequilibrium dynamics of  
765 photoexcited electrons in graphene: Collinear scattering, auger processes, and the impact of  
766 screening. *Phys. Rev. B* **88**, 035430 (2013).

- 767 17. Liang, Y. & Yang, L. Carrier plasmon induced nonlinear band gap renormalization in two-  
768 dimensional semiconductors. *Phys. Rev. Lett.* **114**, 063001 (2015).
- 769 18. Stimper, V., Bauer, S., Ernstorfer, R., Schölkopf, B. & Xian, R. P. Multidimensional contrast  
770 limited adaptive histogram equalization. *IEEE Access* **7**, 165437–165447 (2019).
- 771 19. Xian, R. P. *et al.* A machine learning route between band mapping and band structure.  
772 *arXiv:2005.10210* (2020).
- 773 20. Kormányos, A. *et al.*  $k \cdot p$  theory for two-dimensional transition metal dichalcogenide  
774 semiconductors. *2D Mater.* **2**, 022001 (2015).
- 775 21. Selig, M. *et al.* Dark and bright exciton formation, thermalization, and photoluminescence in  
776 monolayer transition metal dichalcogenides. *2D Mater.* **5**, 035017 (2018).
- 777 22. Yeh, P.-C. *et al.* Layer-dependent electronic structure of an atomically heavy two-dimensional  
778 dichalcogenide. *Phys. Rev. B* **91**, 041407 (2015).
- 779 23. Zhang, Y. *et al.* Electronic structure, surface doping, and optical response in epitaxial wse2  
780 thin films. *Nano Lett.* **16**, 2485–2491 (2016).
- 781 24. Harb, M. *et al.* Carrier relaxation and lattice heating dynamics in silicon revealed by  
782 femtosecond electron diffraction. *J. Phys. Chem. B* **110**, 25308–25313 (2006).
- 783 25. Hong, J., Senga, R., Pichler, T. & Suenaga, K. Probing exciton dispersions of freestanding  
784 monolayer WSe<sub>2</sub> by momentum-resolved electron energy-loss spectroscopy. *Phys. Rev. Lett.*  
785 **124**, 087401 (2020).

- 786 26. Selig, M. *et al.* Ultrafast dynamics in monolayer transition metal dichalcogenides: interplay  
787 of dark excitons, phonons, and intervalley exchange. *Phys. Rev. Res.* **1**, 022007 (2019).
- 788 27. Selig, M. *et al.* Excitonic linewidth and coherence lifetime in monolayer transition metal  
789 dichalcogenides. *Nat. Commun.* **7**, 13279 (2016).
- 790 28. Dong, S. *et al.* Direct measurement of key exciton properties: Energy, dynamics, and spatial  
791 distribution of the wave function. *Nat. Sci.* **1**, e10010 (2021).
- 792 29. Ovesen, S. *et al.* Interlayer exciton dynamics in van der Waals heterostructures. *Commun.*  
793 *Phys.* **2**, 1–8 (2019).
- 794 30. Katsch, F., Selig, M. & Knorr, A. Theory of coherent pump–probe spectroscopy in monolayer  
795 transition metal dichalcogenides. *2D Mater.* **7**, 015021 (2019).
- 796 31. Selig, M., Malic, E., Ahn, K. J., Koch, N. & Knorr, A. Theory of optically induced Förster  
797 coupling in van der Waals coupled heterostructures. *Phys. Rev. B* **99**, 035420 (2019).
- 798 32. Rana, F. Electron-hole generation and recombination rates for coulomb scattering in graphene.  
799 *Phys. Rev. B* **76**, 155431 (2007).
- 800 33. Wendler, F., Knorr, A. & Malic, E. Carrier multiplication in graphene under landau  
801 quantization. *Nat. Commun.* **5**, 3703 (2014).
- 802 34. Dexter, D. L. A theory of sensitized luminescence in solids. *J. Chem. Phys.* **21**, 836–850  
803 (1953).



- 804 35. Reich, S., Maultzsch, J., Thomsen, C. & Ordejon, P. Tight-binding description of graphene.  
805 *Phys. Rev. B* **66**, 035412 (2002).
- 806 36. Chernikov, A. *et al.* Exciton binding energy and nonhydrogenic Rydberg series in monolayer  
807  $\text{WS}_2$ . *Phys. Rev. Lett.* **113**, 076802 (2014).
- 808 37. Wu, F., Qu, F. & Macdonald, A. H. Exciton band structure of monolayer  $\text{MoS}_2$ . *Phys. Rev. B*  
809 **91**, 075310 (2015).
- 810 38. Robert, C. *et al.* Optical spectroscopy of excited exciton states in  $\text{MoS}_2$  monolayers in van der  
811 Waals heterostructures. *Phys. Rev. Mater.* **2**, 011001 (2018).
- 812 39. Rytova, N. S. Screened potential of a point charge in a thin film. *arXiv:1806.00976* (2018).
- 813 40. Keldysh, L. Coulomb interaction in thin semiconductor and semimetal films. *J. Exp. Theor.*  
814 *Phys.* **29**, 658 (1979).
- 815 41. Cudazzo, P., Tokatly, I. V. & Rubio, A. Dielectric screening in two-dimensional insulators:  
816 Implications for excitonic and impurity states in graphene. *Phys. Rev. B* **84**, 085406 (2011).
- 817 42. Piscanec, S., Lazzeri, M., Mauri, F., Ferrari, A. & Robertson, J. Kohn anomalies and electron-  
818 phonon interactions in graphite. *Phys. Rev. Lett.* **93**, 185503 (2004).
- 819 43. Jin, Z., Li, X., Mullen, J. T. & Kim, K. W. Intrinsic transport properties of electrons and holes  
820 in monolayer transition-metal dichalcogenides. *Phys. Rev. B* **90**, 045422 (2014).
- 821 44. Kormányos, A., Zólyomi, V., Drummond, N. D. & Burkard, G. Spin-orbit coupling, quantum  
822 dots, and qubits in monolayer transition metal dichalcogenides. *Phys. Rev. X* **4**, 011034 (2014).

- 823 45. Berghäuser, G. & Malic, E. Analytical approach to excitonic properties of MoS<sub>2</sub>. *Phys. Rev.*  
824 *B* **89**, 125309 (2014).
- 825 46. Malic, E., Winzer, T., Bobkin, E. & Knorr, A. Microscopic theory of absorption and ultrafast  
826 many-particle kinetics in graphene. *Phys. Rev. B* **84**, 205406 (2011).
- 827 47. Christiansen, D. *et al.* Phonon sidebands in monolayer transition metal dichalcogenides. *Phys.*  
828 *Rev. Lett.* **119**, 187402 (2017).
- 829 48. Bessler, R., Duerig, U. & Koren, E. The dielectric constant of a bilayer graphene interface.  
830 *Nanoscale Adv.* **1**, 1702–1706 (2019).
- 831 49. Ye, S. *et al.* Thickness-dependent strain effect on the deformation of the graphene-  
832 encapsulated Au nanoparticles. *J. Nanomater.* **2014** (2014).
- 833 50. Berkelbach, T. C., Hybertsen, M. S. & Reichman, D. R. Theory of neutral and charged excitons  
834 in monolayer transition metal dichalcogenides. *Phys. Rev. B* **88**, 045318 (2013).
